# Supplementary material
Source: Royal Society of Chemistry journal article supplement (doi:10.1039/d6cp01226d)
Supplement: d6cp01226d12.pdf [file d6cp01226d12.pdf]

# **Dynamic Distance Modulation and Active Site Separation in Ru<sub>1</sub>-Ru<sub>3</sub>@MoS<sub>2</sub> Catalyst for C-O Bond Activation**

Shouqin Mu, Jiehang Wei, Tao Ma, Yuxin Xu, Wenjuan Wang, Mengjia Fu, Yingtao Liu, Xin Wang\*,

School of Chemistry and Chemical Engineering, Ningxia University, Yinchuan 750021, China.

*E-mail address:* wangxin@nxu.edu.cn (X., Wang)

The binding energy of TM@MoS<sub>2</sub> ( $E_b$ ) can be calculated as follows:

$$E_b = (E_{cat} - E_{2S-vacMoS_2} - E_{Ru(SA)} - E_{Ru(NC)})/n \quad (1)$$

Where  $E_{cat}$  represents the total energy of the catalyst,  $E_{2S-vacMoS_2}$  denotes the energy of molybdenum disulfide containing two sulfur vacancies.  $E_{Ru(SA)}$  denotes the energy of a metallic Ru<sub>1</sub> atom.  $E_{Ru(NC)}$  represents the energy of the Ru<sub>3</sub> cluster. Where n represents the number of Ru atoms

$$\Delta G = \Delta E + \Delta E_{ZPE} - T\Delta S \quad (2)$$

The Gibbs free energy difference ( $\Delta G$ ) for each elementary reaction step is calculated according to Eq. S2, where  $\Delta E$ ,  $\Delta E_{ZPE}$ , and  $\Delta S$  represent the computed reaction (electronic) energy, zero-point energy difference, and entropy difference between the products and reactants at room temperature (T = 298.15 K), respectively.

The activation energy barrier ( $\Delta G_{act}$ ) for the initial reaction is calculated as follows:

$$\Delta G_{act} = G_{TS} - G_{IS} \quad (3)$$

$G_{TS}$  and  $G_{IS}$  represent the transition state free energy and the initial state free energy, respectively.

The reaction free energy ( $\Delta G_{rea}$ ) is calculated as follows:

$$\Delta G_{act} = G_{FS} - G_{IS} \quad (4)$$

where  $G_{FS}$  is the free energy of the final state.

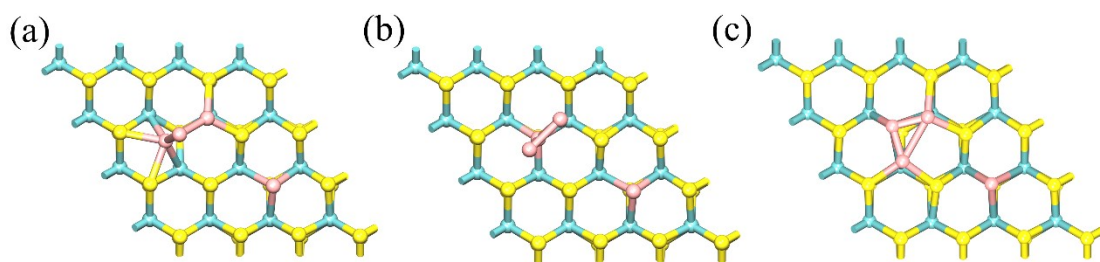

**Fig. S1.** Tuning of the Ru<sub>3</sub> site configuration in the synergistic Ru<sub>1</sub>-Ru<sub>3</sub>@MoS<sub>2</sub> catalyst. (a) Perpendicular placement of the Ru<sub>3</sub> cluster; (b) Inverted placement of the Ru<sub>3</sub> cluster; (c) Parallel placement of the Ru<sub>3</sub> cluster.

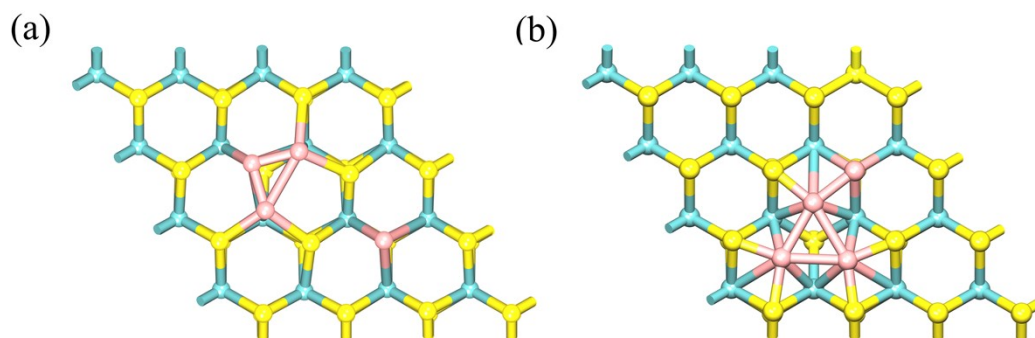

**Fig. S2.** The influence of different sulfur vacancy positions on the catalyst structure, (a) distant vacancy; (b) adjacent vacancy.

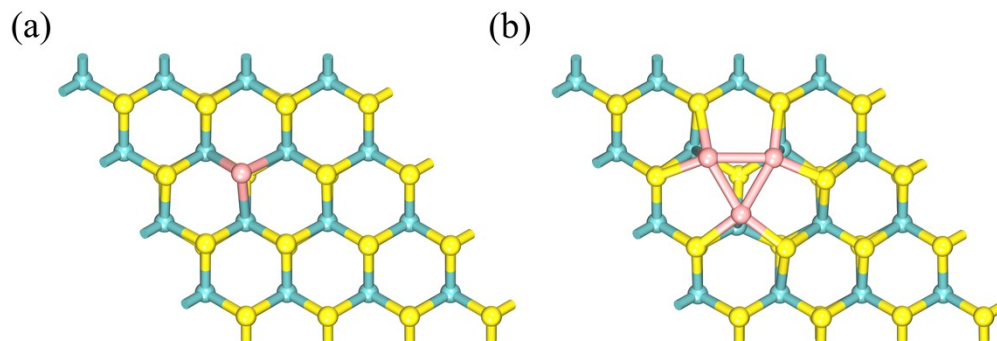

**Fig. S3.** The reference catalysts formed by loading Ru single atom or Ru<sub>3</sub> cluster alone. (a) Ru<sub>1</sub>@MoS<sub>2</sub>; (b) Ru<sub>3</sub>@MoS<sub>2</sub>.

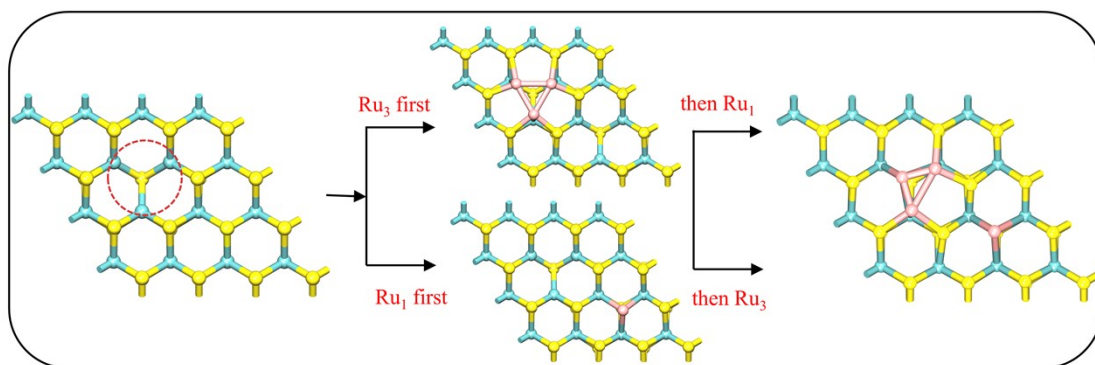

**Fig. S4.** Construction of the Ru<sub>1</sub>-Ru<sub>3</sub>@MoS<sub>2</sub> catalyst under different loading sequences.

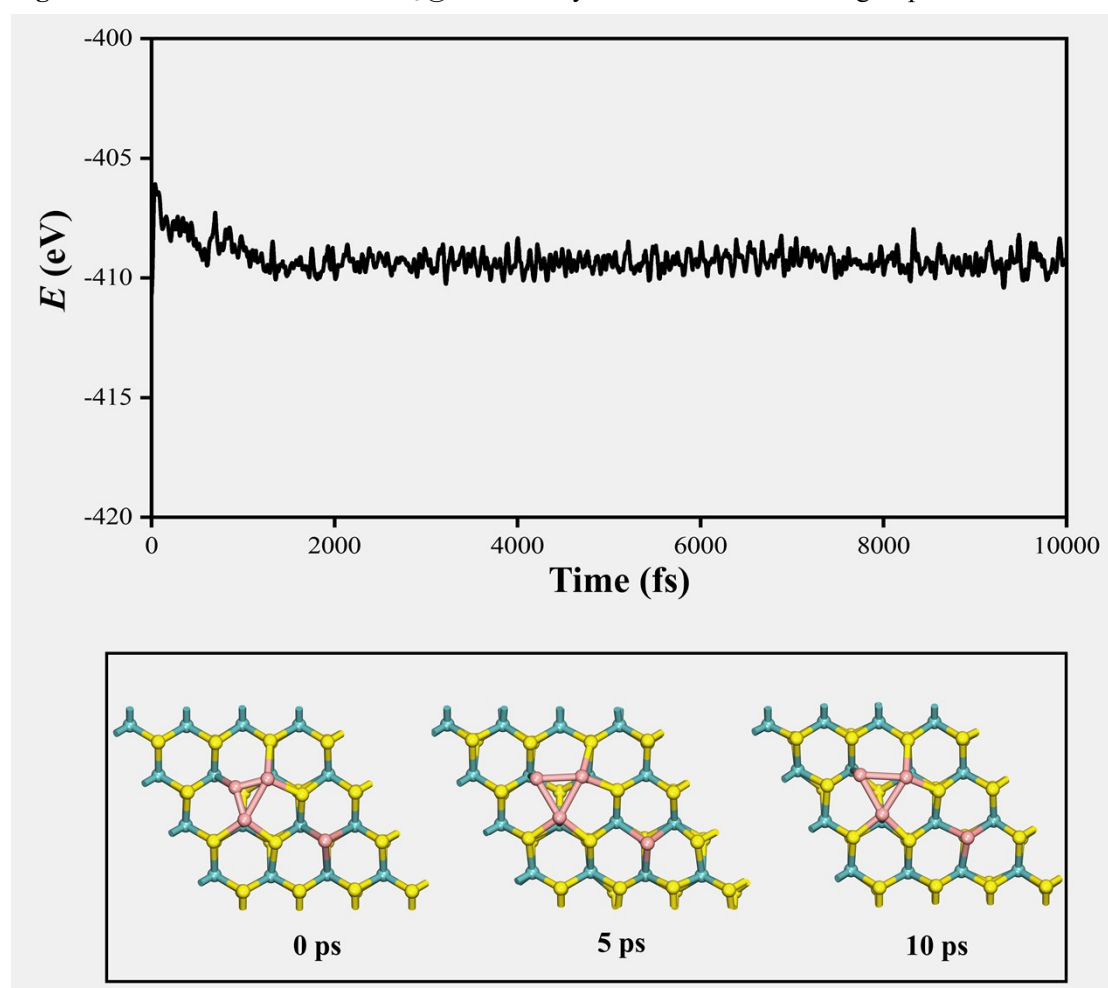

**Fig. S5.** Energy evolution trend and structural snapshots at different time points of the Ru<sub>1</sub>-Ru<sub>3</sub>@MoS<sub>2</sub> system in 0-10 ps neural network molecular dynamics simulations.

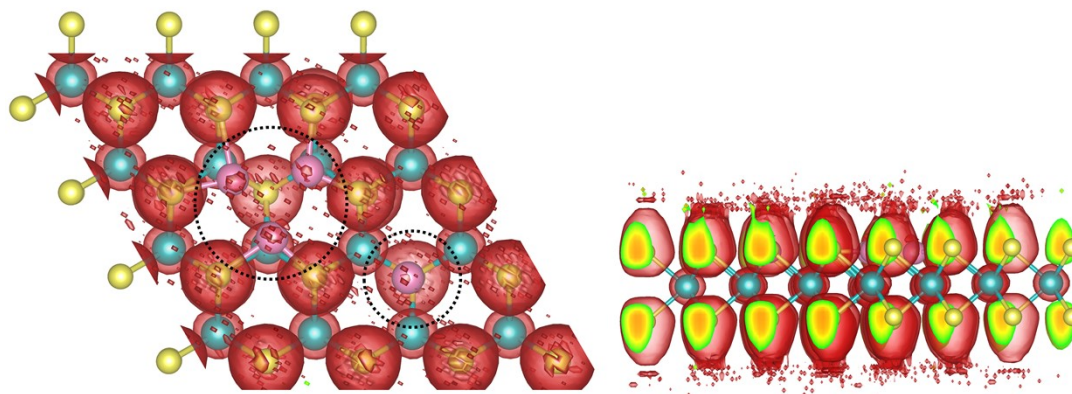

**Fig.S6.** The three dimensional distribution of electron localization function map. Red regions indicate electron density accumulation, the black dashed circle indicates the electron delocalization region of the Ru species.

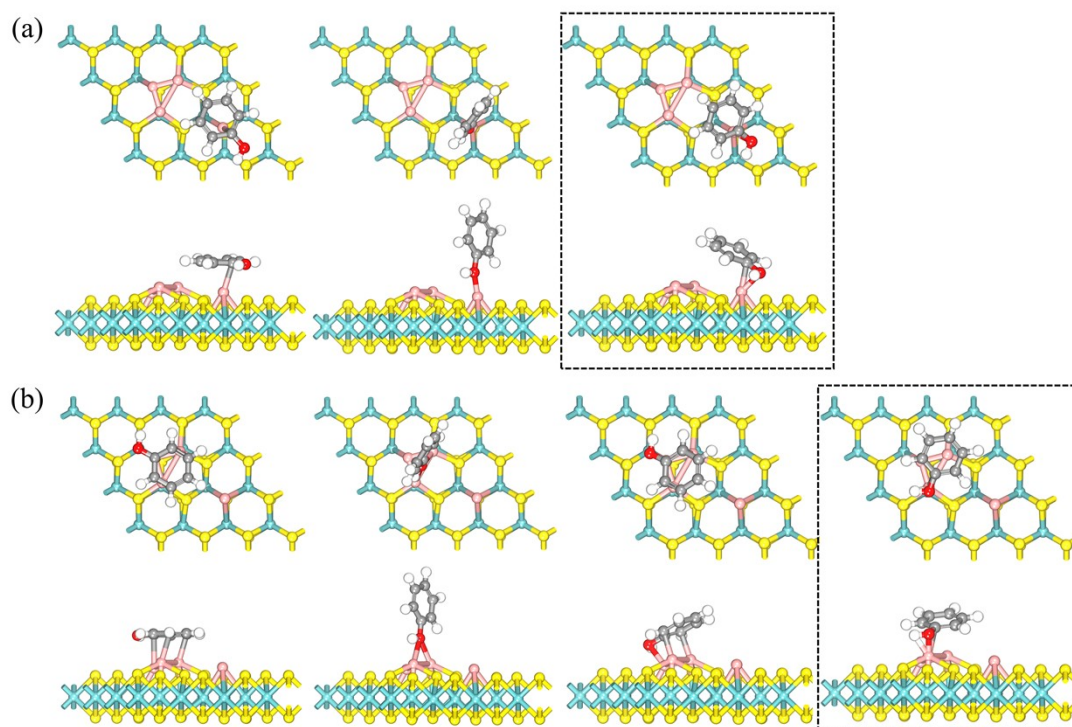

**Fig. S7.** Parallel, Vertical, and inclined adsorption configurations of phenol for (a) Ru<sub>1</sub>-i-ad (b) Ru<sub>3</sub>-i-ad (S, yellow; Mo, green; Ru, pink; C, gray; H, white).

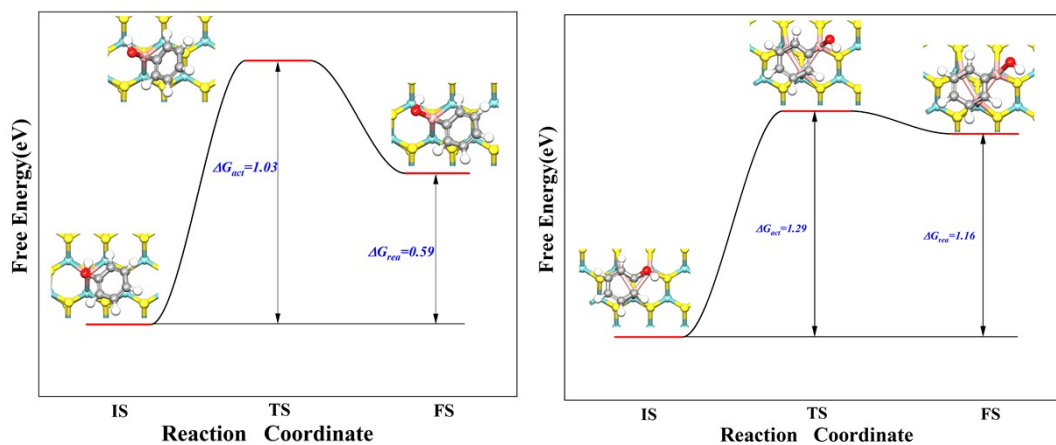

**Fig. S8.** Activation energy barriers of  $\text{Ru}_1@MoS_2$  and  $\text{Ru}_3@MoS_2$  for the C-O bond cleavage in the first elementary step.

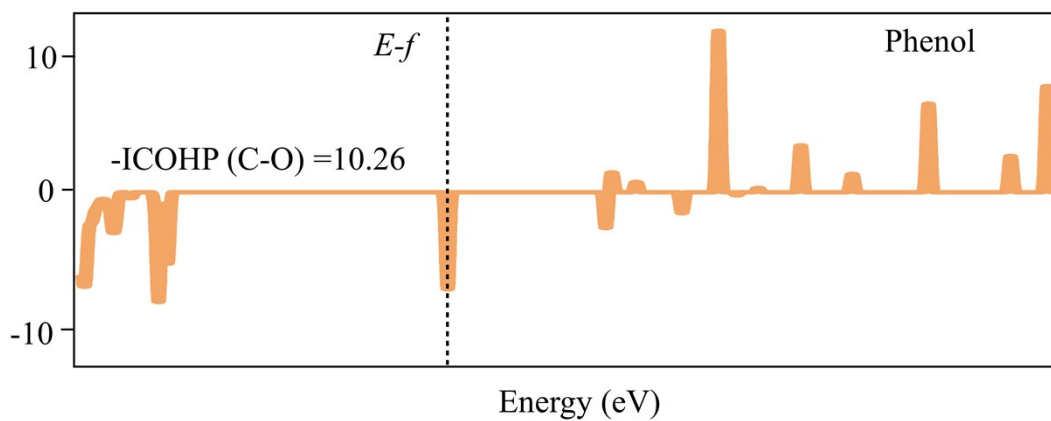

**Fig. S9.** Schematic of the COHP for the C-O bond in free gaseous phenol before adsorption.

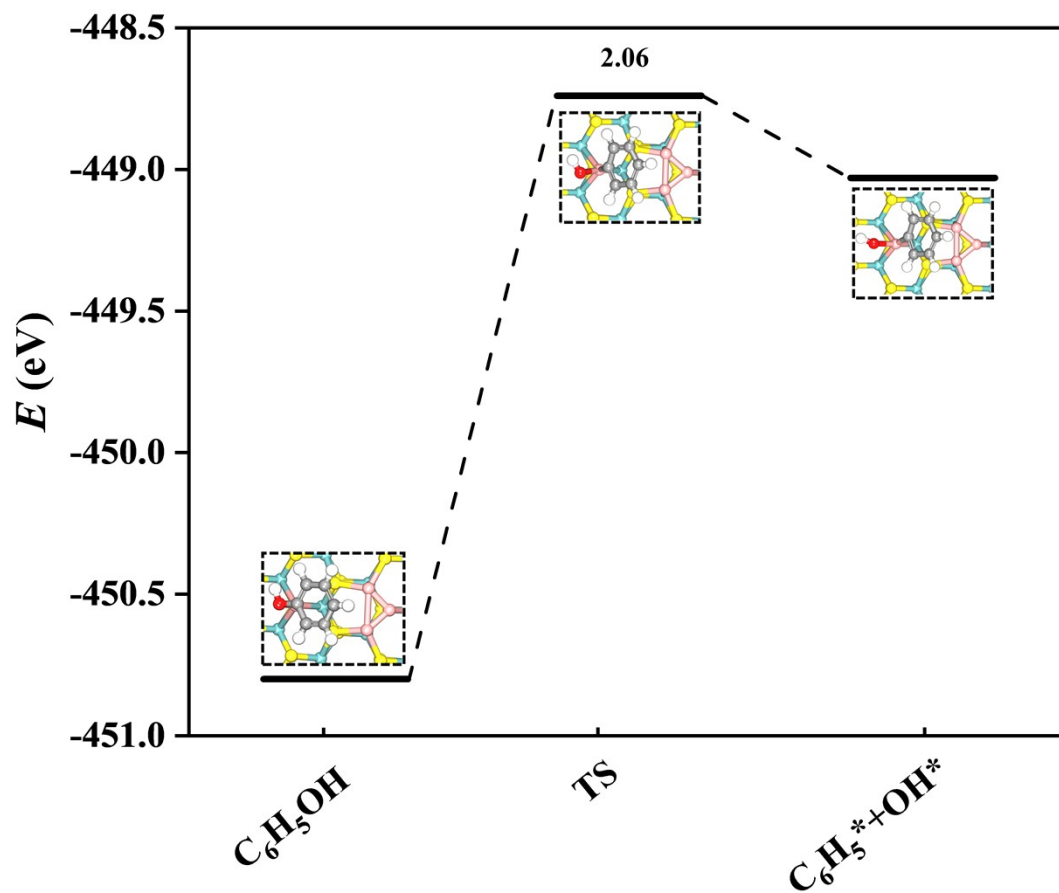

**Fig. S10.** Minimum energy pathway for the step  $C_6H_5OH^* \rightarrow TS1 \rightarrow C_6H_5^* + OH^*$  in the main-text Fig. 3a, calculated with the catalyst substrate structurally constrained.

**Table S1.** Binding energies of catalysts corresponding to different Ru<sub>3</sub> placements in Ru<sub>1</sub>-Ru<sub>3</sub>@MoS<sub>2</sub>.

| reference catalysts | Perpendicular placement | Inverted placement | Parallel placement |
|---------------------|-------------------------|--------------------|--------------------|
| $E_b$               | -3.37                   | -3.38              | -3.51              |

**Table S2.** Binding Energy of catalysts under different vacancy configurations.

| reference catalysts | distant vacancy | adjacent vacancy |
|---------------------|-----------------|------------------|
| $E_b$               | -3.51           | -2.02            |

**Table S3.** Comparison of binding energies for the reference catalysts: Ru<sub>1</sub>@MoS<sub>2</sub>, Ru<sub>3</sub>@MoS<sub>2</sub>, and the synergistic Ru<sub>1</sub>-Ru<sub>3</sub>@MoS<sub>2</sub> system.

| reference catalysts | Ru <sub>1</sub> @MoS <sub>2</sub> | Ru <sub>3</sub> @MoS <sub>2</sub> | Ru <sub>1</sub> -Ru <sub>3</sub> @MoS <sub>2</sub> |
|---------------------|-----------------------------------|-----------------------------------|----------------------------------------------------|
| $E_b$               | -5.97                             | -2.87                             | -3.51                                              |

**Table S4.** Binding Energy of catalysts under different loading orders

| Loading order | Ru <sub>3</sub> first, then Ru <sub>1</sub> | Ru <sub>1</sub> first, then Ru <sub>3</sub> |
|---------------|---------------------------------------------|---------------------------------------------|
| $E_b$         | -1.05                                       | -2.01                                       |

**Table S5.** Comparison of adsorption free energies ( $\Delta G_{ads}$ ) at the two sites of the catalyst.

| Adsorption configuration | Parallel (eV) | Vertical (eV) | Inclined (eV) |
|--------------------------|---------------|---------------|---------------|
| Ru <sub>1</sub> -i-ad    | -0.53         | -0.30         | -0.82         |
| Ru <sub>3</sub> -i-ad    | -2.10         | -0.51         | -1.97         |
|                          |               |               | -2.27         |

**Table S6.** The free energies and the changes in Gibbs free energy of the initial state (IS), transition state (TS), and final state (FS) on the two active sites in the first elementary reaction, as well as those on their reference catalysts, were calculated and compared.

| C <sub>6</sub> H <sub>5</sub> OH*→TS1→C <sub>6</sub> H <sub>5</sub> *+OH* | IS (eV) | TS (eV) | FS (eV) | $\Delta G_{act}$ | $\Delta G_{rea}$ |
|---------------------------------------------------------------------------|---------|---------|---------|------------------|------------------|
| Ru <sub>1</sub> -i-ad                                                     | -453.51 | -452.84 | -453.98 | 0.67             | -0.47            |
| Ru <sub>3</sub> -i-ad                                                     | -448.02 | -447.31 | -447.91 | 0.71             | 0.11             |
| Ru <sub>1</sub> @MoS <sub>2</sub>                                         | -438.22 | -437.19 | -437.63 | 1.03             | 0.59             |
| Ru <sub>3</sub> @MoS <sub>2</sub>                                         | -454.24 | -452.95 | -453.08 | 1.29             | 1.16             |

**Table S7.** The C-O bond length of IS, TS and FS in the first elementary reaction.

| C <sub>6</sub> H <sub>5</sub> OH*→TS1→C <sub>6</sub> H <sub>5</sub> *+OH* | IS <sub>LC-O</sub> (Å) | TS <sub>LC-O</sub> (Å) | FS <sub>LC-O</sub> (Å) |
|---------------------------------------------------------------------------|------------------------|------------------------|------------------------|
| Ru <sub>1</sub> -i-ad                                                     | 1.38                   | 1.92                   | 3.18                   |
| Ru <sub>3</sub> -i-ad                                                     | 1.38                   | 1.90                   | 2.34                   |
| Ru <sub>1</sub> @MoS <sub>2</sub>                                         | 1.40                   | 2.03                   | 2.61                   |
| Ru <sub>3</sub> @MoS <sub>2</sub>                                         | 1.37                   | 2.16                   | 2.38                   |

**Table S8.** The free energies and the changes in Gibbs free energy of the initial state (IS),

transition state (TS), and final state (FS) on the two active sites in the second elementary reaction.

| $C_6H_5^* + H^* \rightarrow TS2 \rightarrow C_6H_6^* + OH^*$ | IS (eV) | TS (eV) | FS (eV) | $\Delta G_{act}$ | $\Delta G_{rea}$ |
|--------------------------------------------------------------|---------|---------|---------|------------------|------------------|
| Ru <sub>1</sub> -i-ad                                        | -458.03 | -458.01 | -459.90 | 0.02             | -1.87            |
| Ru <sub>3</sub> -i-ad                                        | -451.00 | -450.51 | -451.75 | 0.49             | -0.75            |

**Table S9.** The C-H bond length of IS, TS and FS in the second elementary reaction.

| $C_6H_5^* + H^* \rightarrow TS2 \rightarrow C_6H_6^* + OH^*$ | IS <sub>LC-H</sub> (Å) | TS <sub>LC-H</sub> (Å) | FS <sub>LC-H</sub> (Å) |
|--------------------------------------------------------------|------------------------|------------------------|------------------------|
| Ru <sub>1</sub> -i-ad                                        | 2.55                   | 2.10                   | 0.96                   |
| Ru <sub>3</sub> -i-ad                                        | 2.35                   | 2.11                   | 0.93                   |

**Table S10.** The free energies and the changes in Gibbs free energy of the initial state (IS), transition state (TS), and final state (FS) on the two active sites in the third elementary reaction.

| $OH^* + H^* \rightarrow TS3 \rightarrow H_2O^*$ | IS (eV) | TS (eV) | FS (eV) | $\Delta G_{act}$ | $\Delta G_{rea}$ |
|-------------------------------------------------|---------|---------|---------|------------------|------------------|
| Ru <sub>1</sub> -i-ad                           | -460.78 | -460.57 | -461.52 | 0.21             | -0.74            |
| Ru <sub>3</sub> -i-ad                           | -461.03 | -460.74 | -461.31 | 0.29             | -0.28            |

**Table S11.** The O-H bond length of IS, TS and FS in the third elementary reaction.

| $OH^* + H^* \rightarrow TS3 \rightarrow H_2O^*$ | IS <sub>LO-H</sub> (Å) | TS <sub>LO-H</sub> (Å) | FS <sub>LO-H</sub> (Å) |
|-------------------------------------------------|------------------------|------------------------|------------------------|
| Ru <sub>1</sub> -i-ad                           | 2.34                   | 1.56                   | 1.11                   |
| Ru <sub>3</sub> -i-ad                           | 3.15                   | 1.38                   | 1.23                   |

**Table S12.** Changes in magnetic moments across the elementary reaction steps.

| Reaction                | Spin Magnetic Moments ( $\mu_B$ ) |
|-------------------------|-----------------------------------|
| $C_6H_5OH^*$            | 1.99                              |
| TS1                     | 1.68                              |
| $C_6H_5^* + OH^*$       | 1.99                              |
| $C_6H_5^* + H^* + OH^*$ | 0.99                              |
| TS2                     | 1.19                              |
| $C_6H_6^* + OH^*$       | 1.22                              |
| $H^* + OH^*$            | 0.00                              |
| TS3                     | 3.95                              |
| $H_2O^*$                | 1.99                              |

**Table S13.** The distance between the Ru<sub>1</sub> single atom and the mass center of the Ru<sub>3</sub> cluster, denoted as  $d_{SA-NC}$ .

| Reaction                                  | $d_{SA-NC}(\text{\AA})$ |
|-------------------------------------------|-------------------------|
| C <sub>6</sub> H <sub>5</sub> OH*         | 4.94                    |
| TS1                                       | 4.30                    |
| C <sub>6</sub> H <sub>5</sub> *+OH*       | 4.14                    |
| C <sub>6</sub> H <sub>5</sub> * migration | 4.52                    |
| C <sub>6</sub> H <sub>5</sub> *+H*+OH*    | 4.52                    |
| TS2                                       | 4.31                    |
| C <sub>6</sub> H <sub>6</sub> *+ OH*      | 4.84                    |
| C <sub>6</sub> H <sub>6</sub>             | 4.47                    |
| H*+OH*                                    | 4.27                    |
| TS3                                       | 4.94                    |
| H <sub>2</sub> O*                         | 4.84                    |

**Table S14.** Energy change and C-O bond length variation during Ru<sub>1</sub>-Ru<sub>3</sub>@MoS<sub>2</sub> catalyzed C<sub>6</sub>H<sub>5</sub>OH\* → TS1 → C<sub>6</sub>H<sub>5</sub>\* reaction after substrate fixation.

|               | IS      | TS      | FS      |
|---------------|---------|---------|---------|
| $E$ (eV)      | -450.80 | -448.74 | -449.03 |
| $d_{C-O}$ (Å) | 1.38    | 1.93    | 2.54    |
