# Supplementary material
Source: Royal Society of Chemistry journal article supplement (doi:10.1039/d6cp01226d)

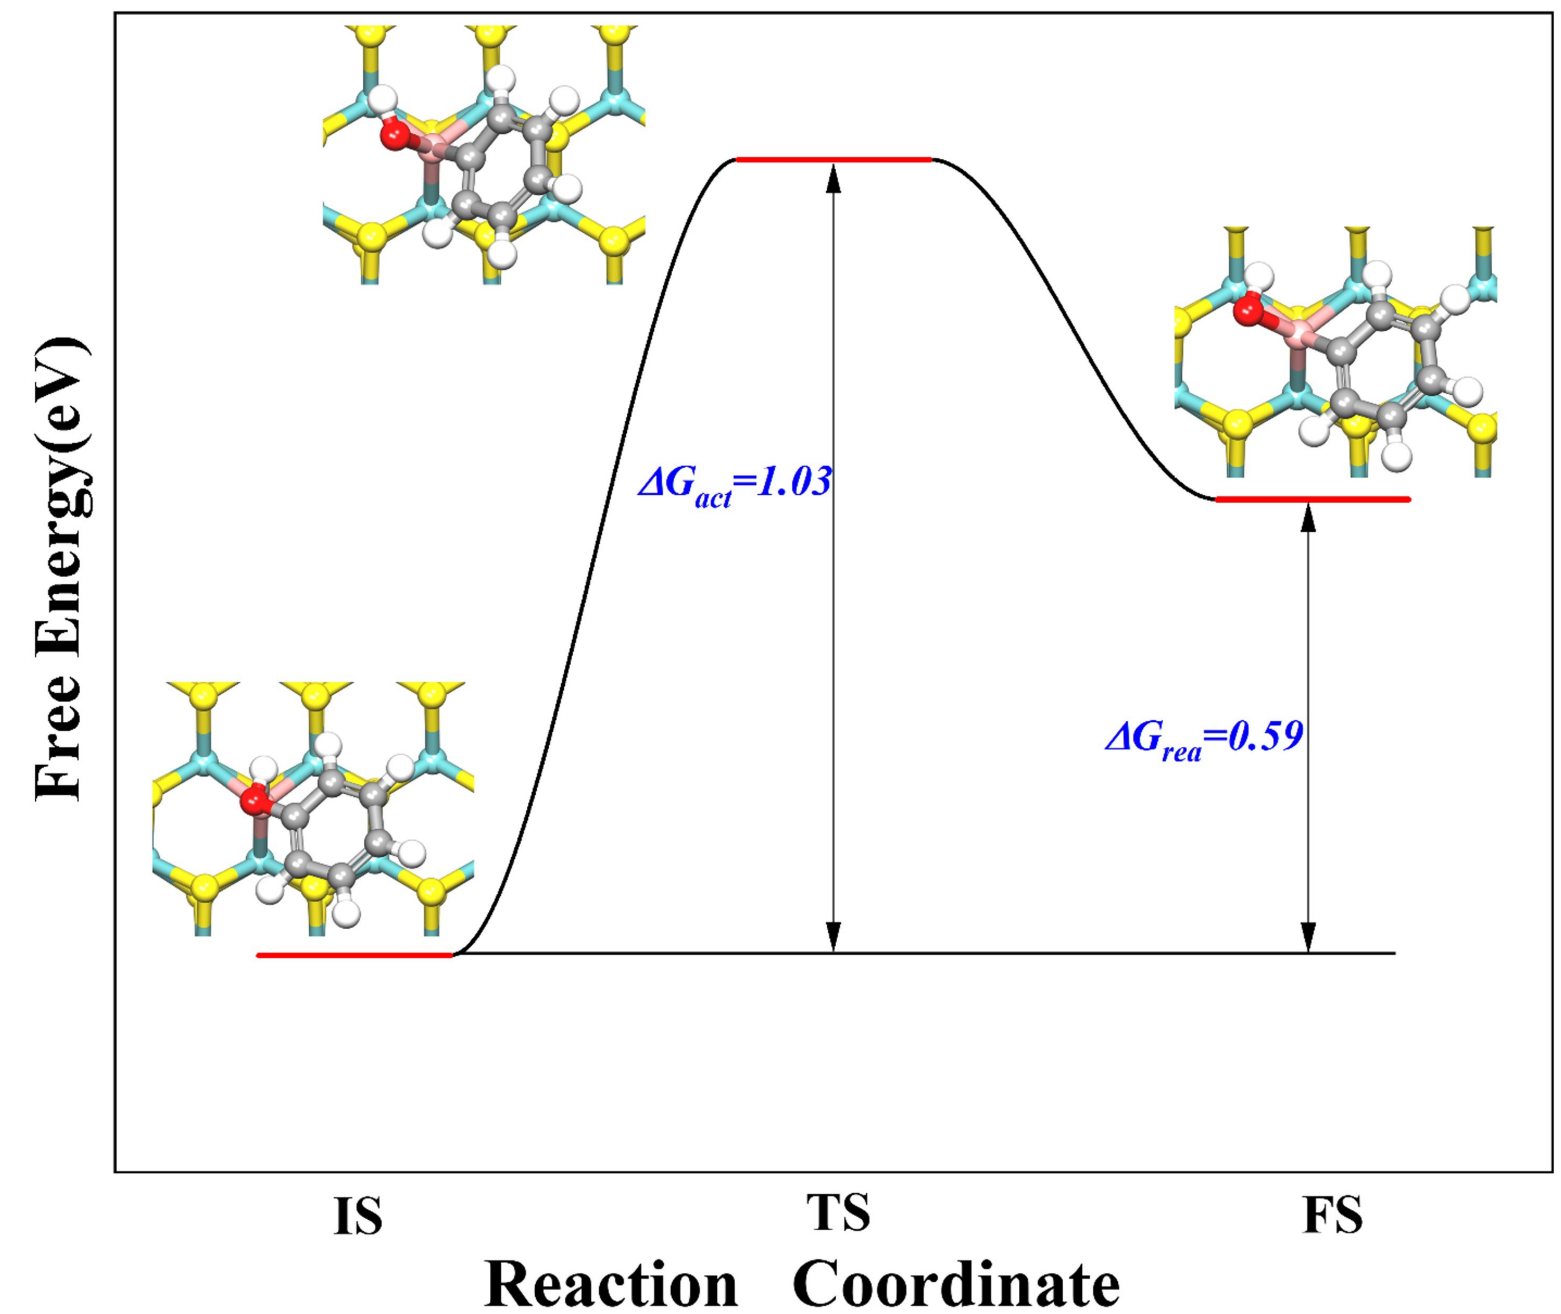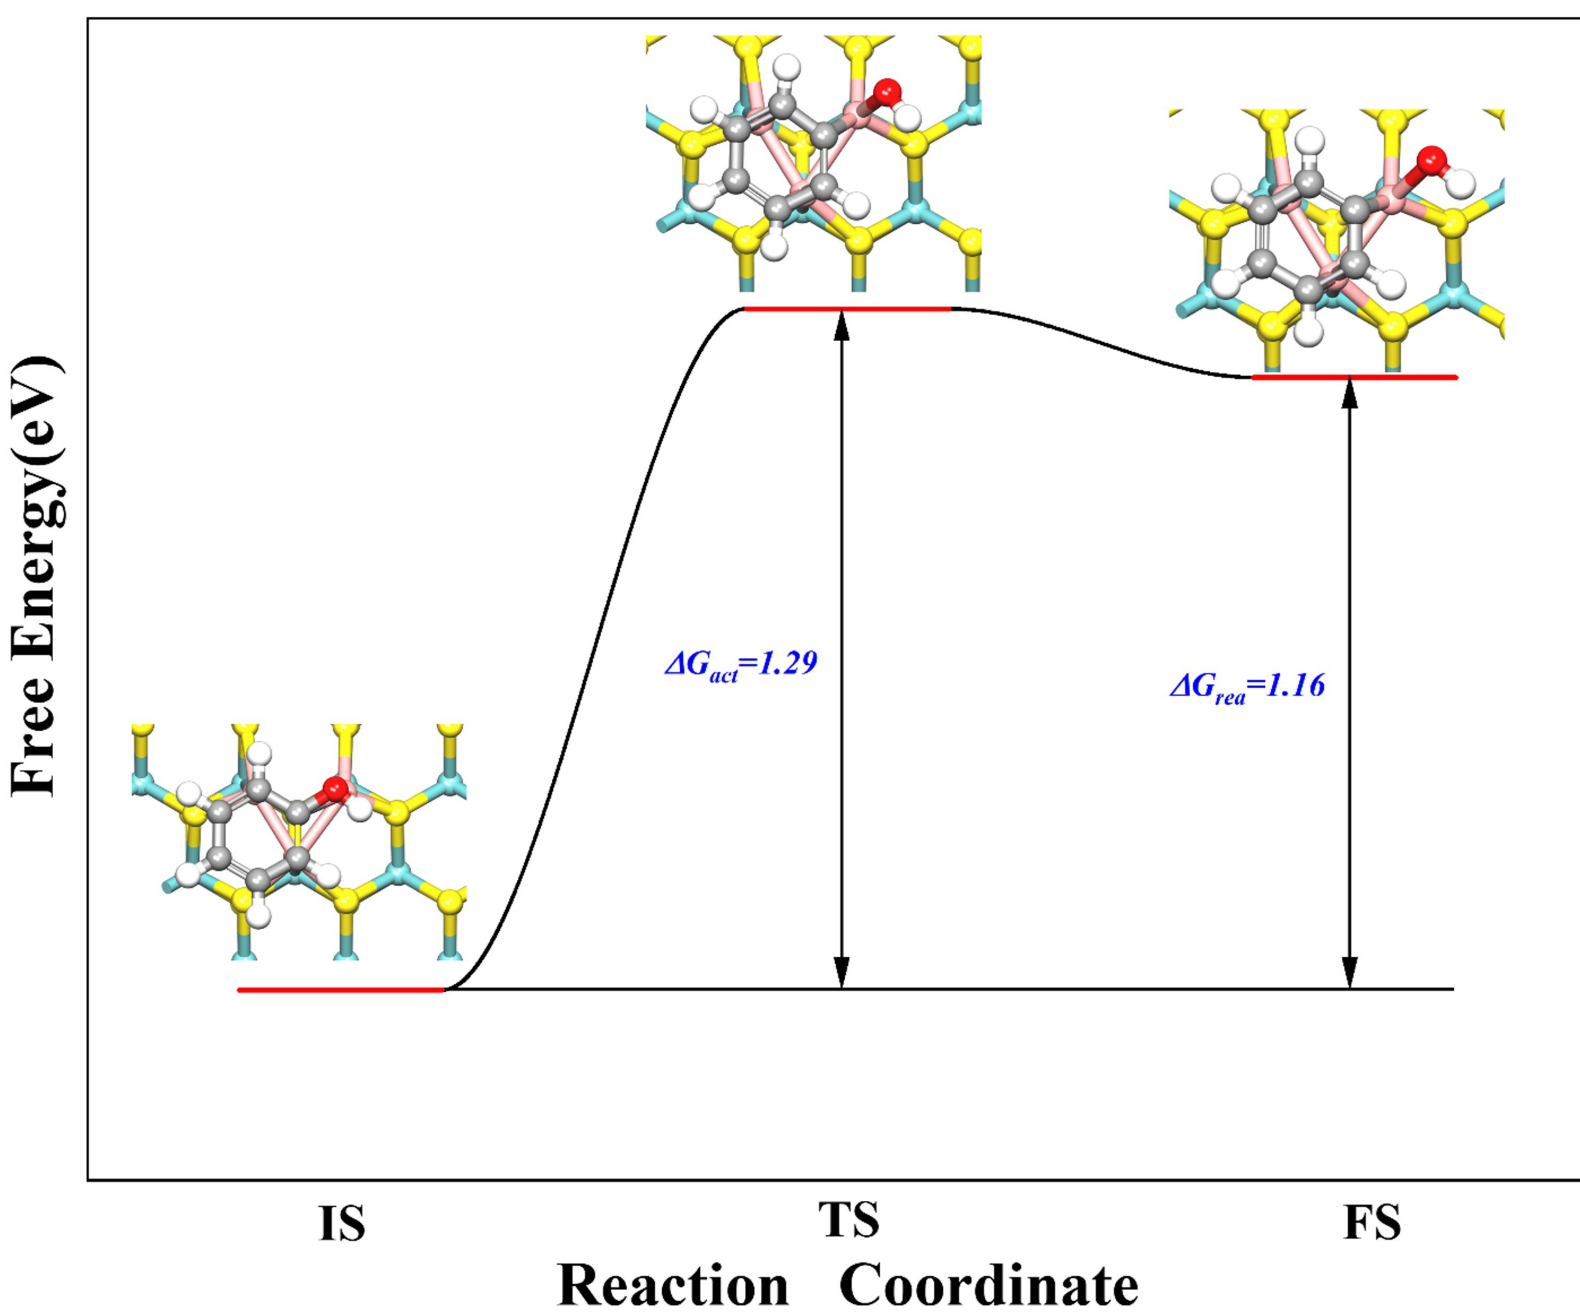

Supplement: d6cp01226d10.pdf [file d6cp01226d10.pdf]

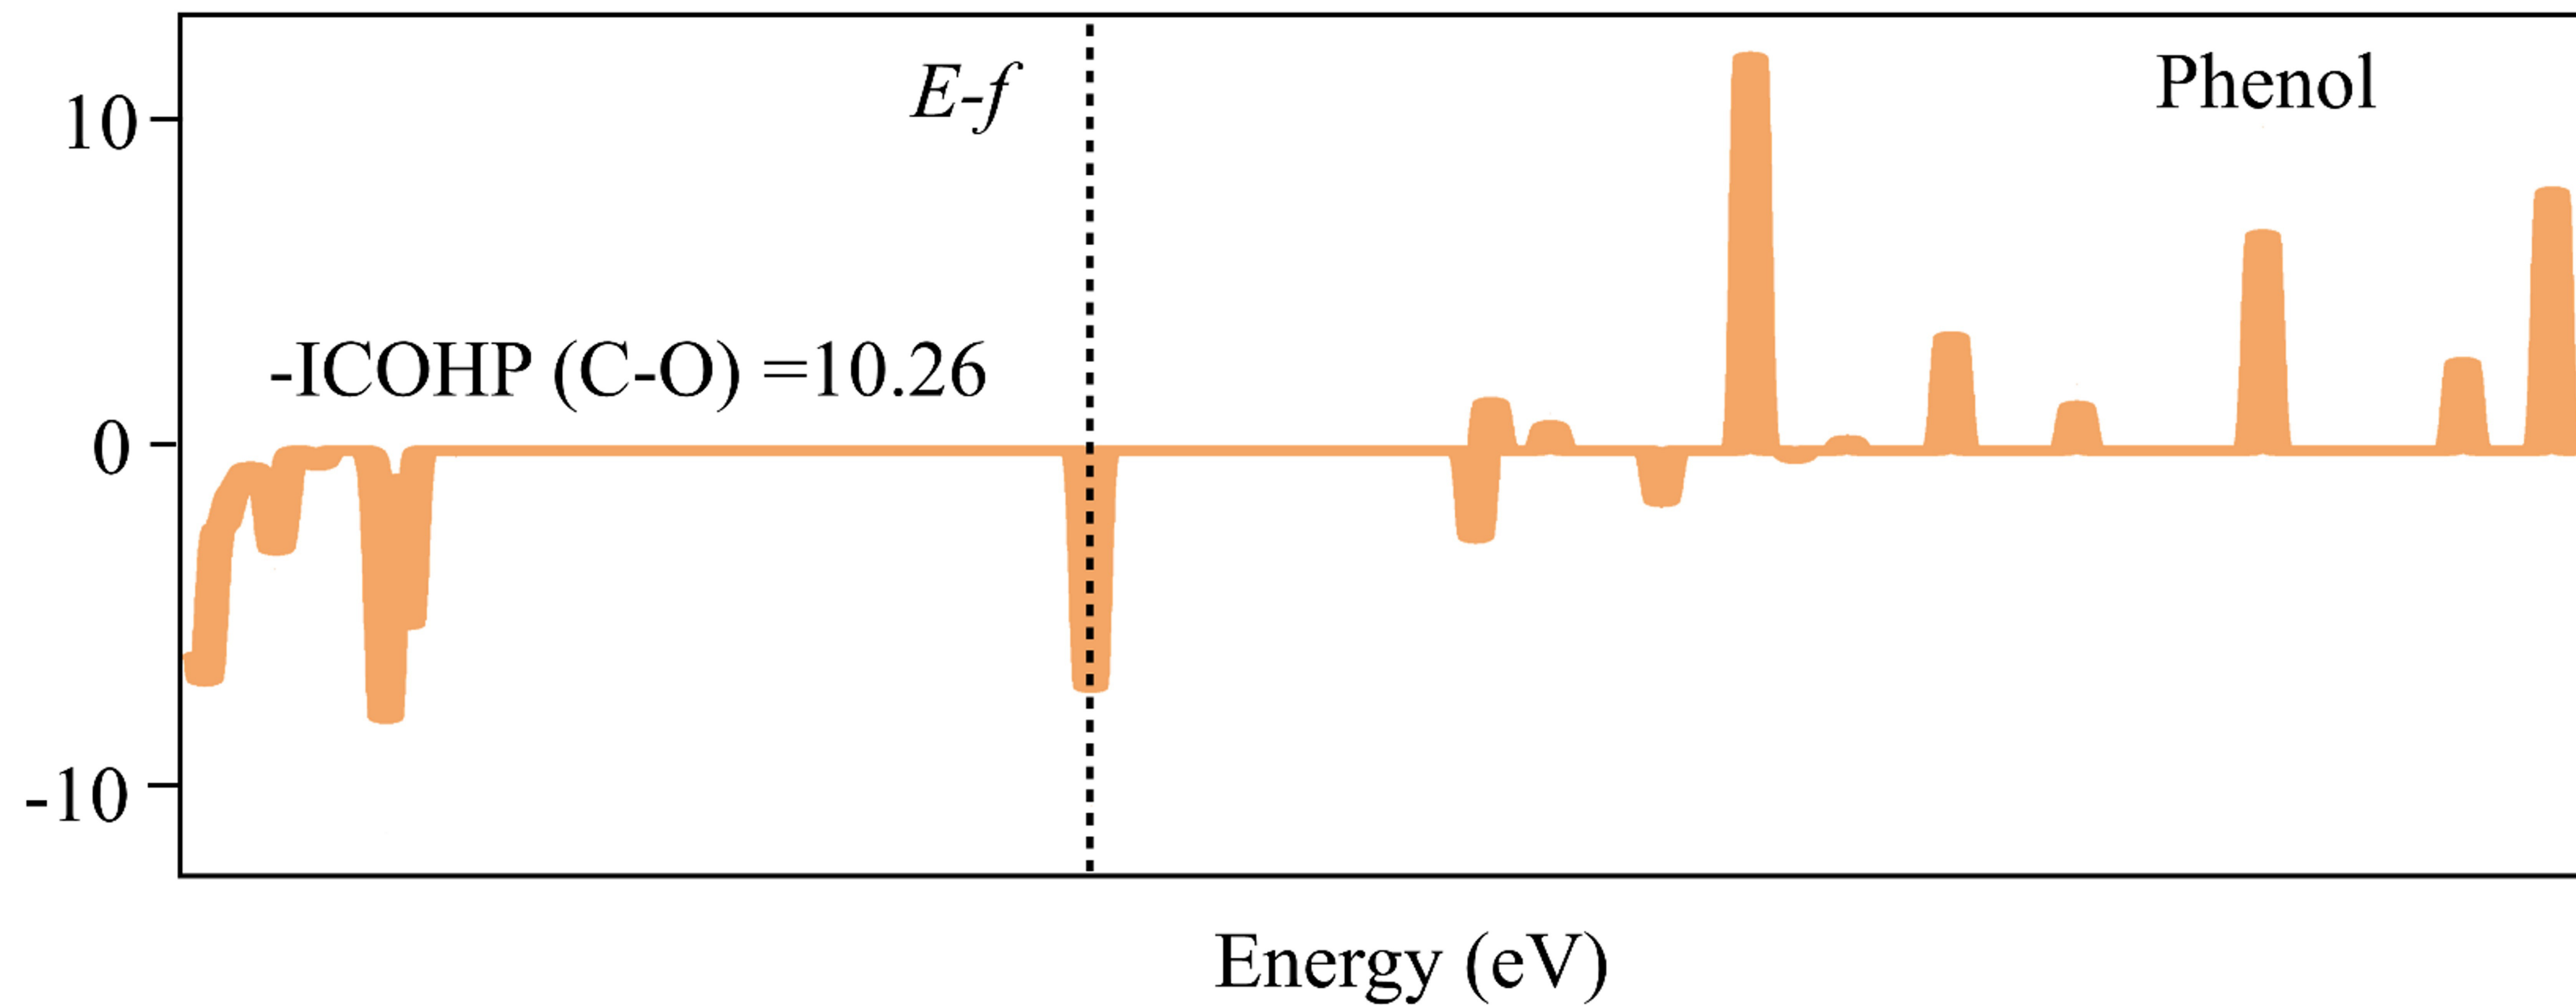

Supplement: d6cp01226d11.pdf [file d6cp01226d11.pdf]

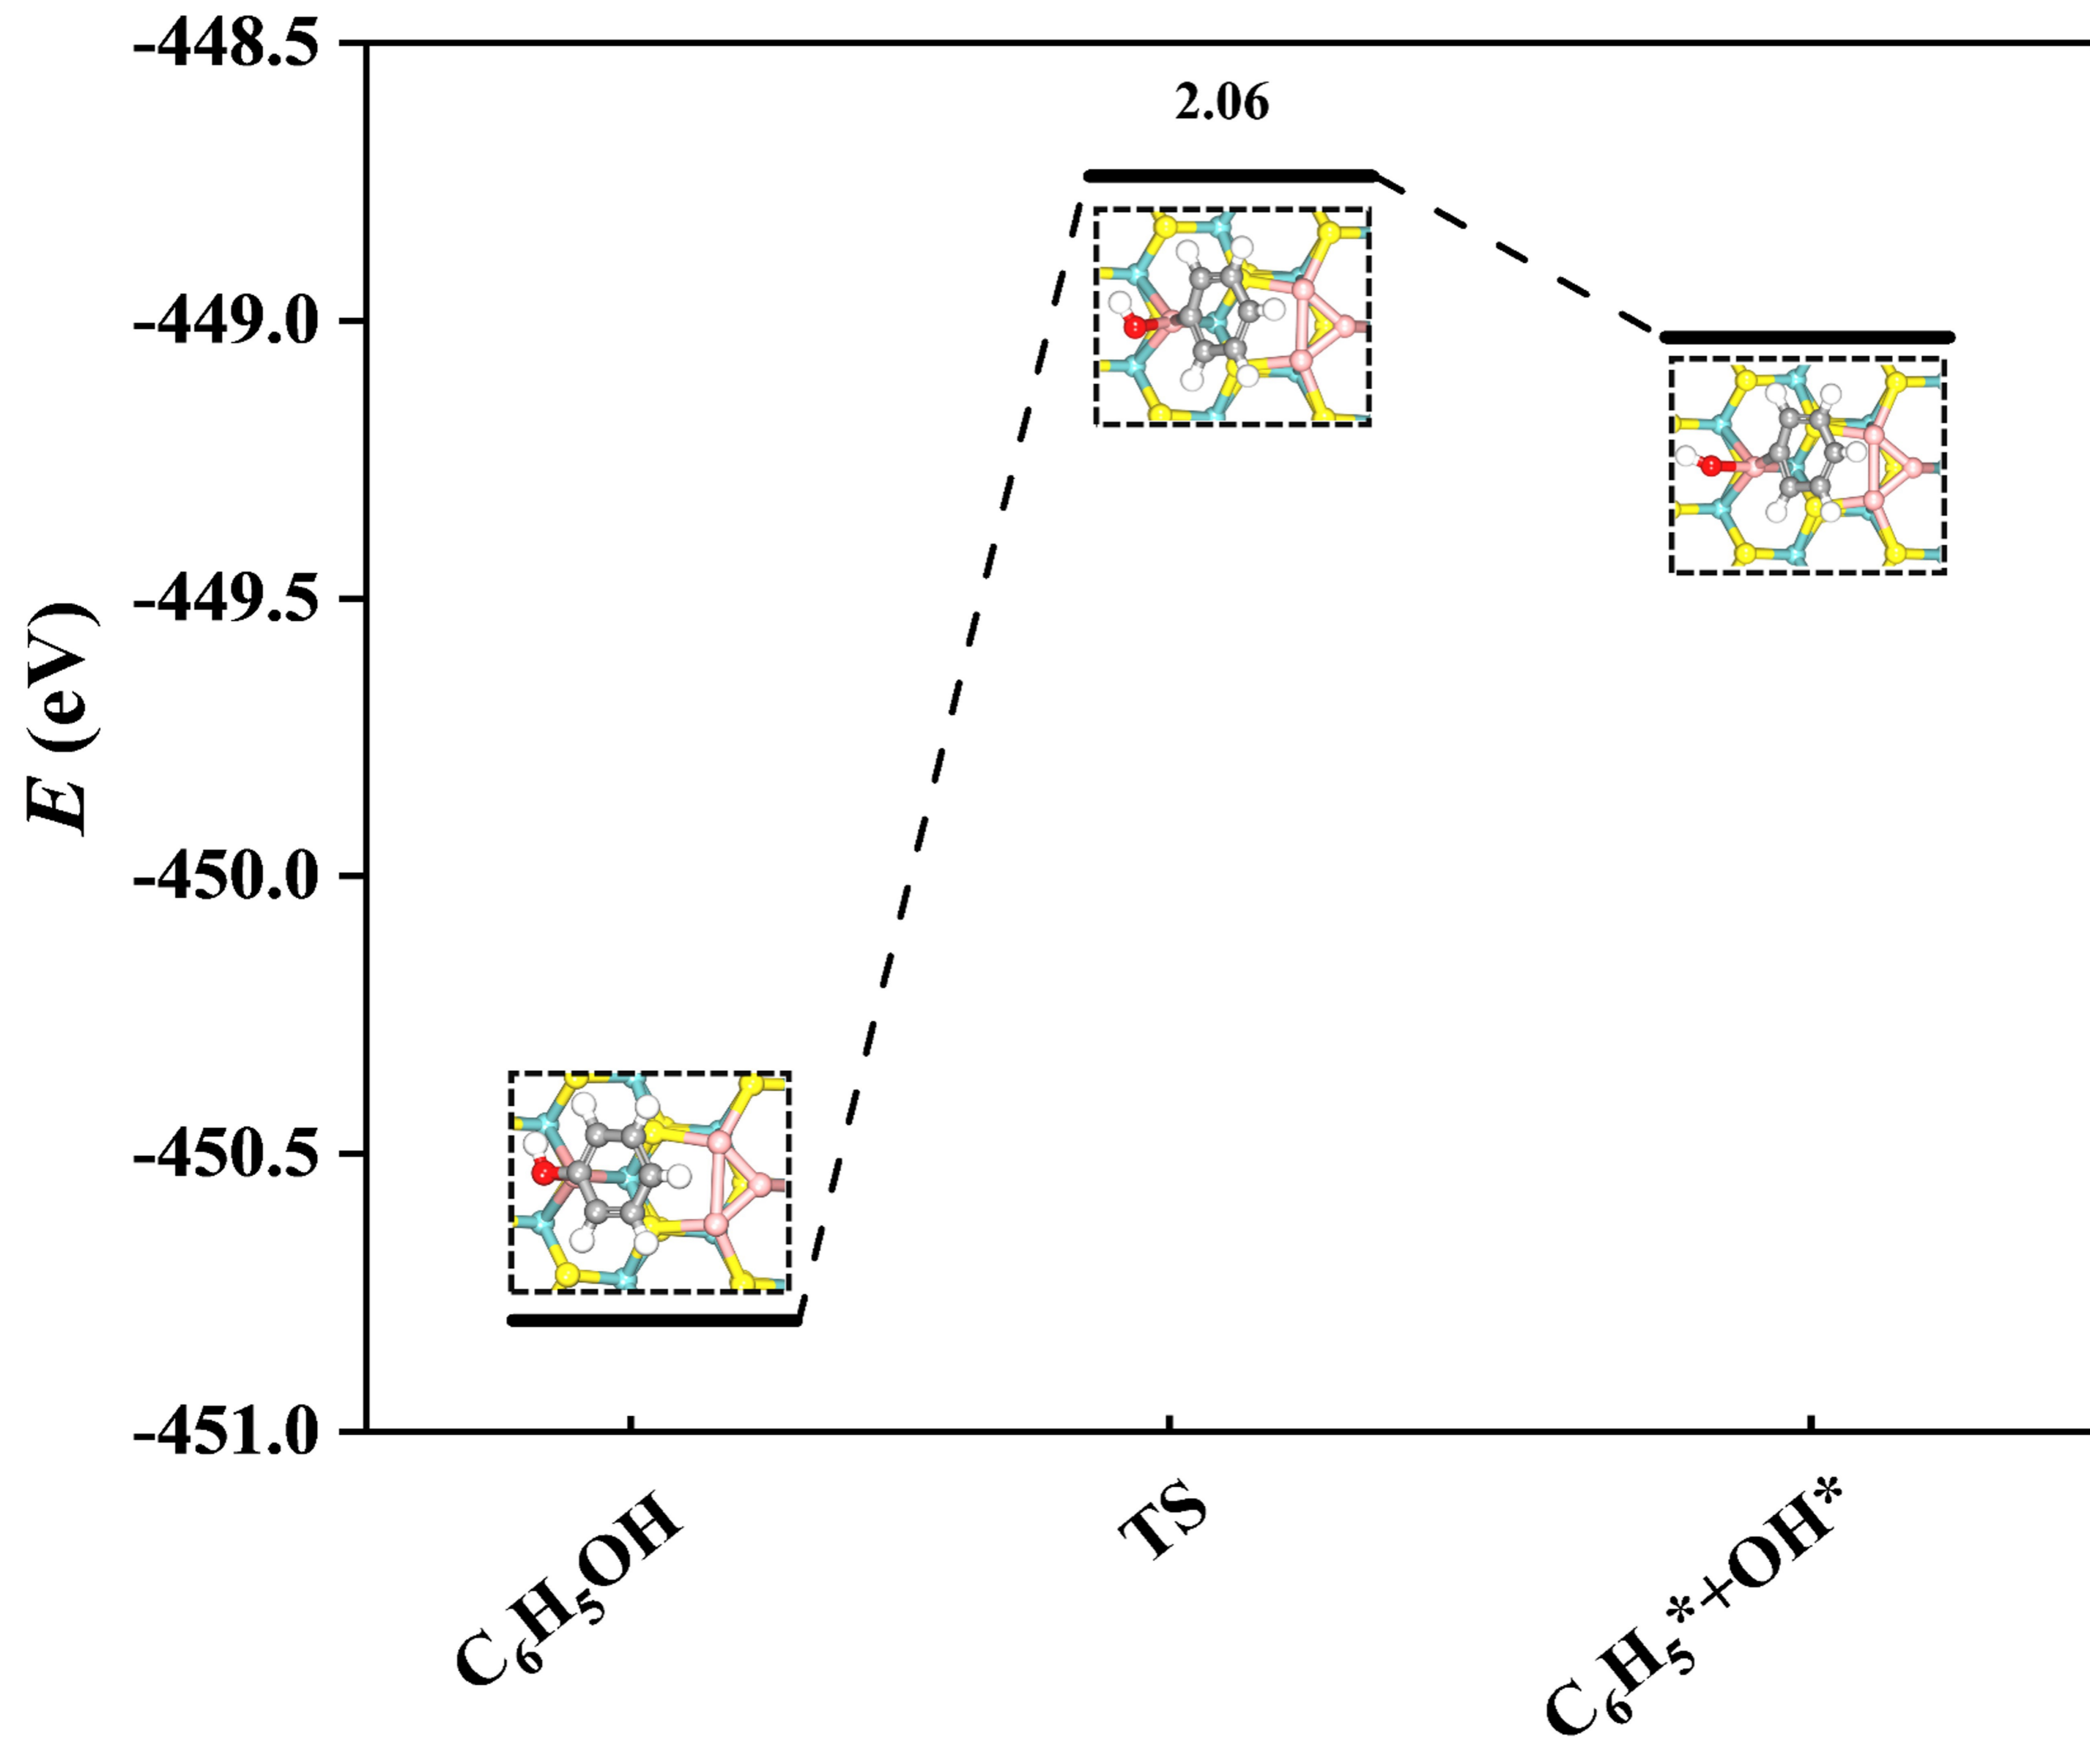

Supplement: d6cp01226d3.pdf [file d6cp01226d3.pdf]

(a)

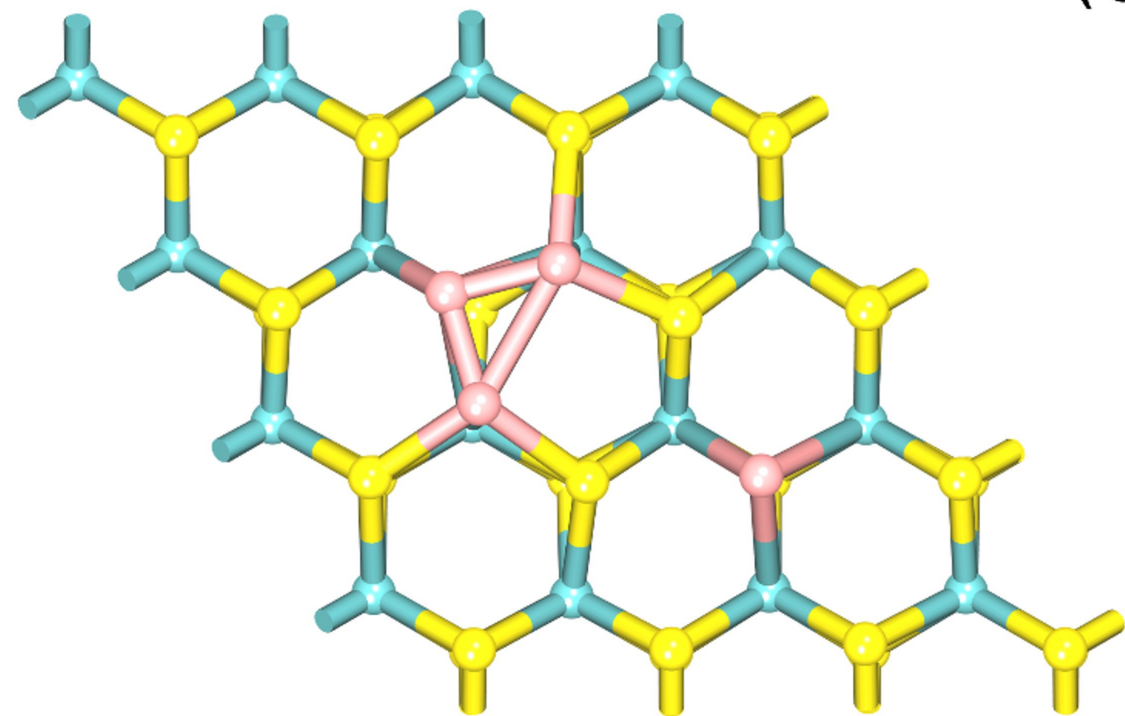

(b)

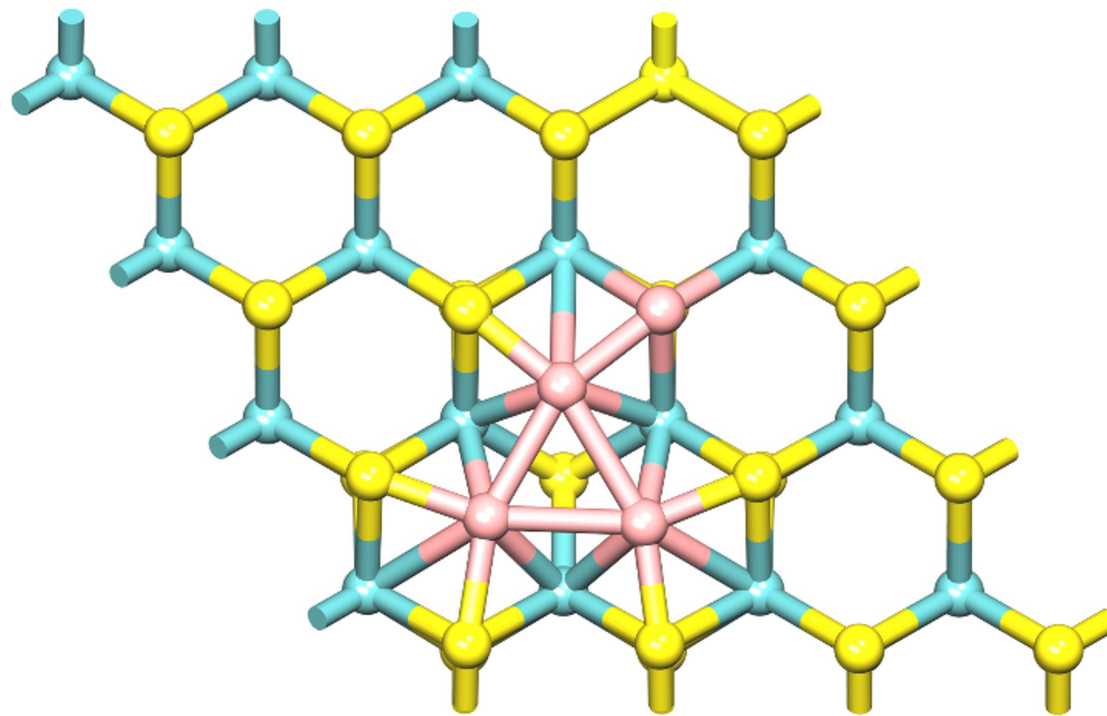

Supplement: d6cp01226d4.pdf [file d6cp01226d4.pdf]

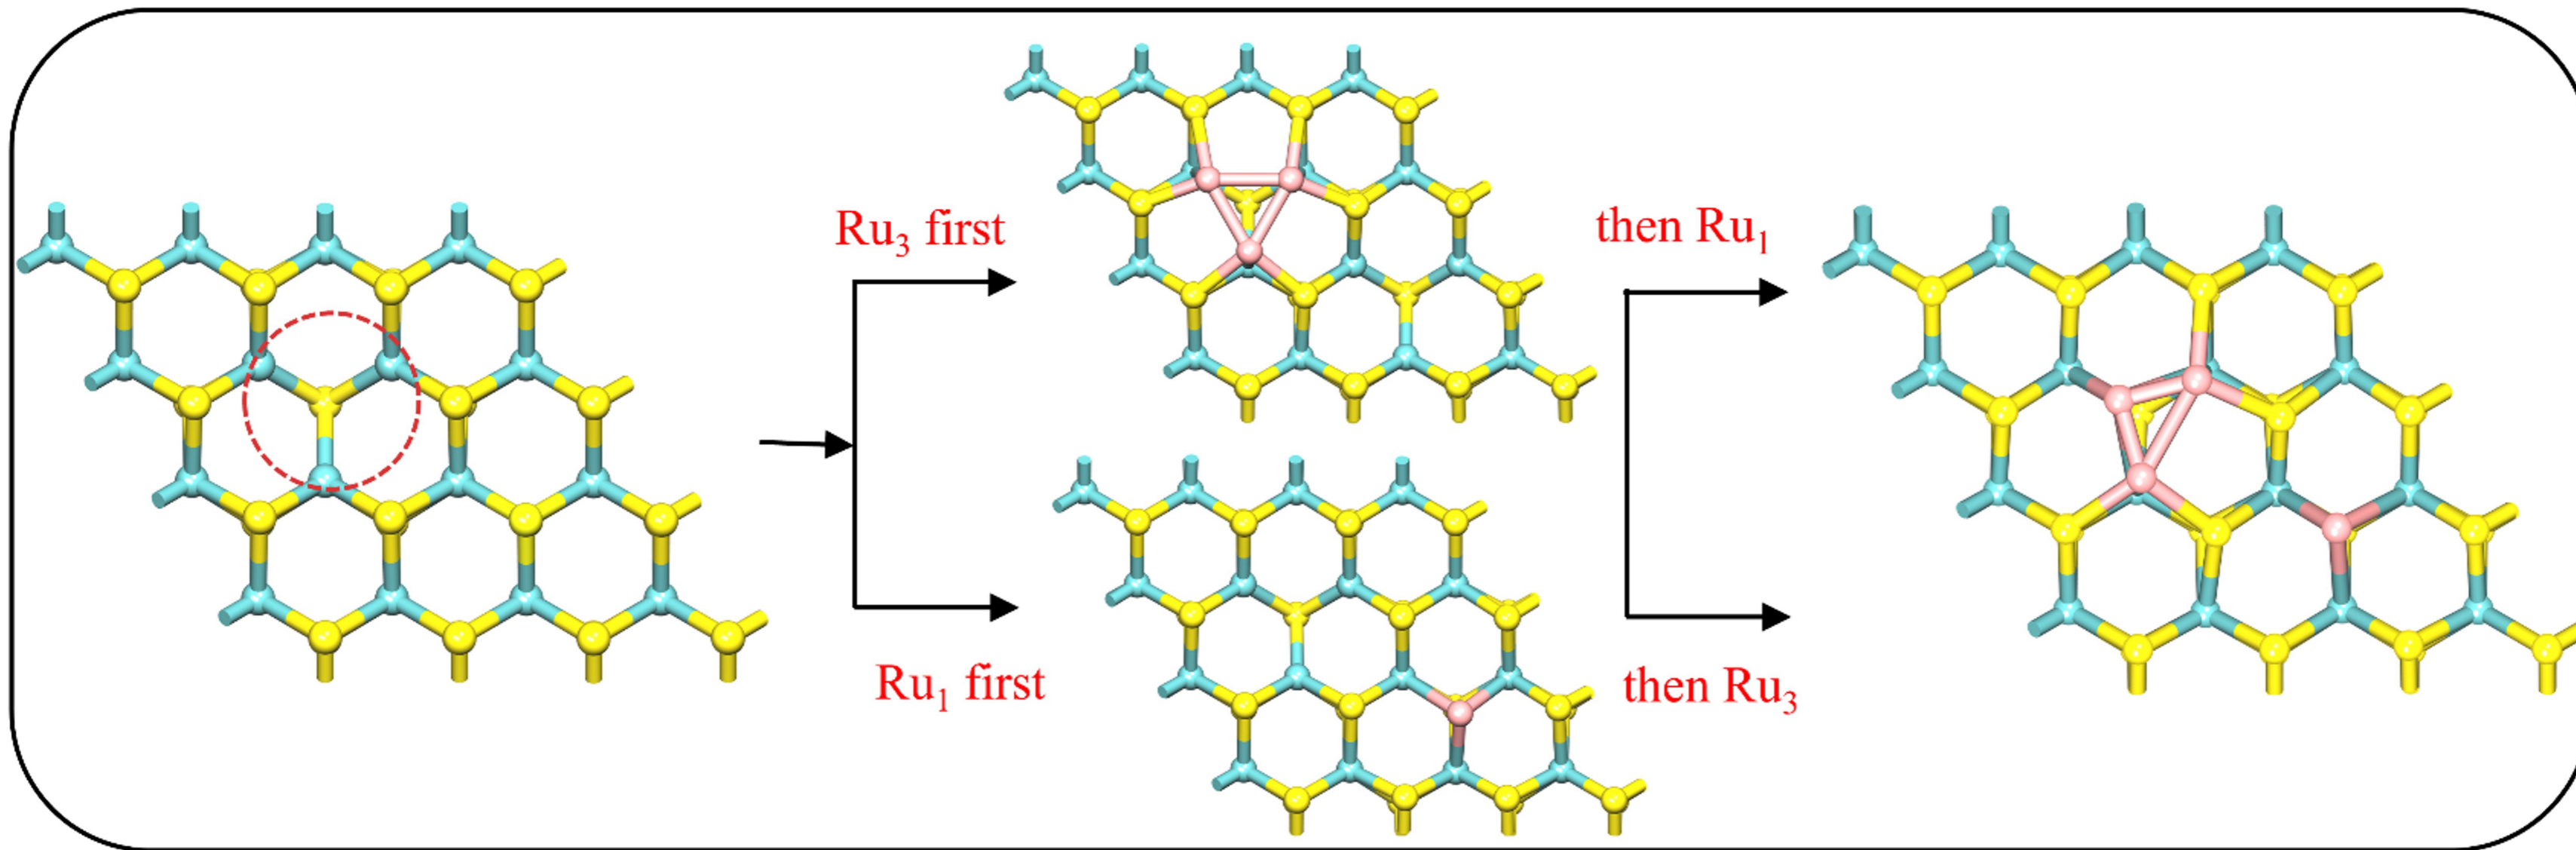

Supplement: d6cp01226d6.pdf [file d6cp01226d6.pdf]

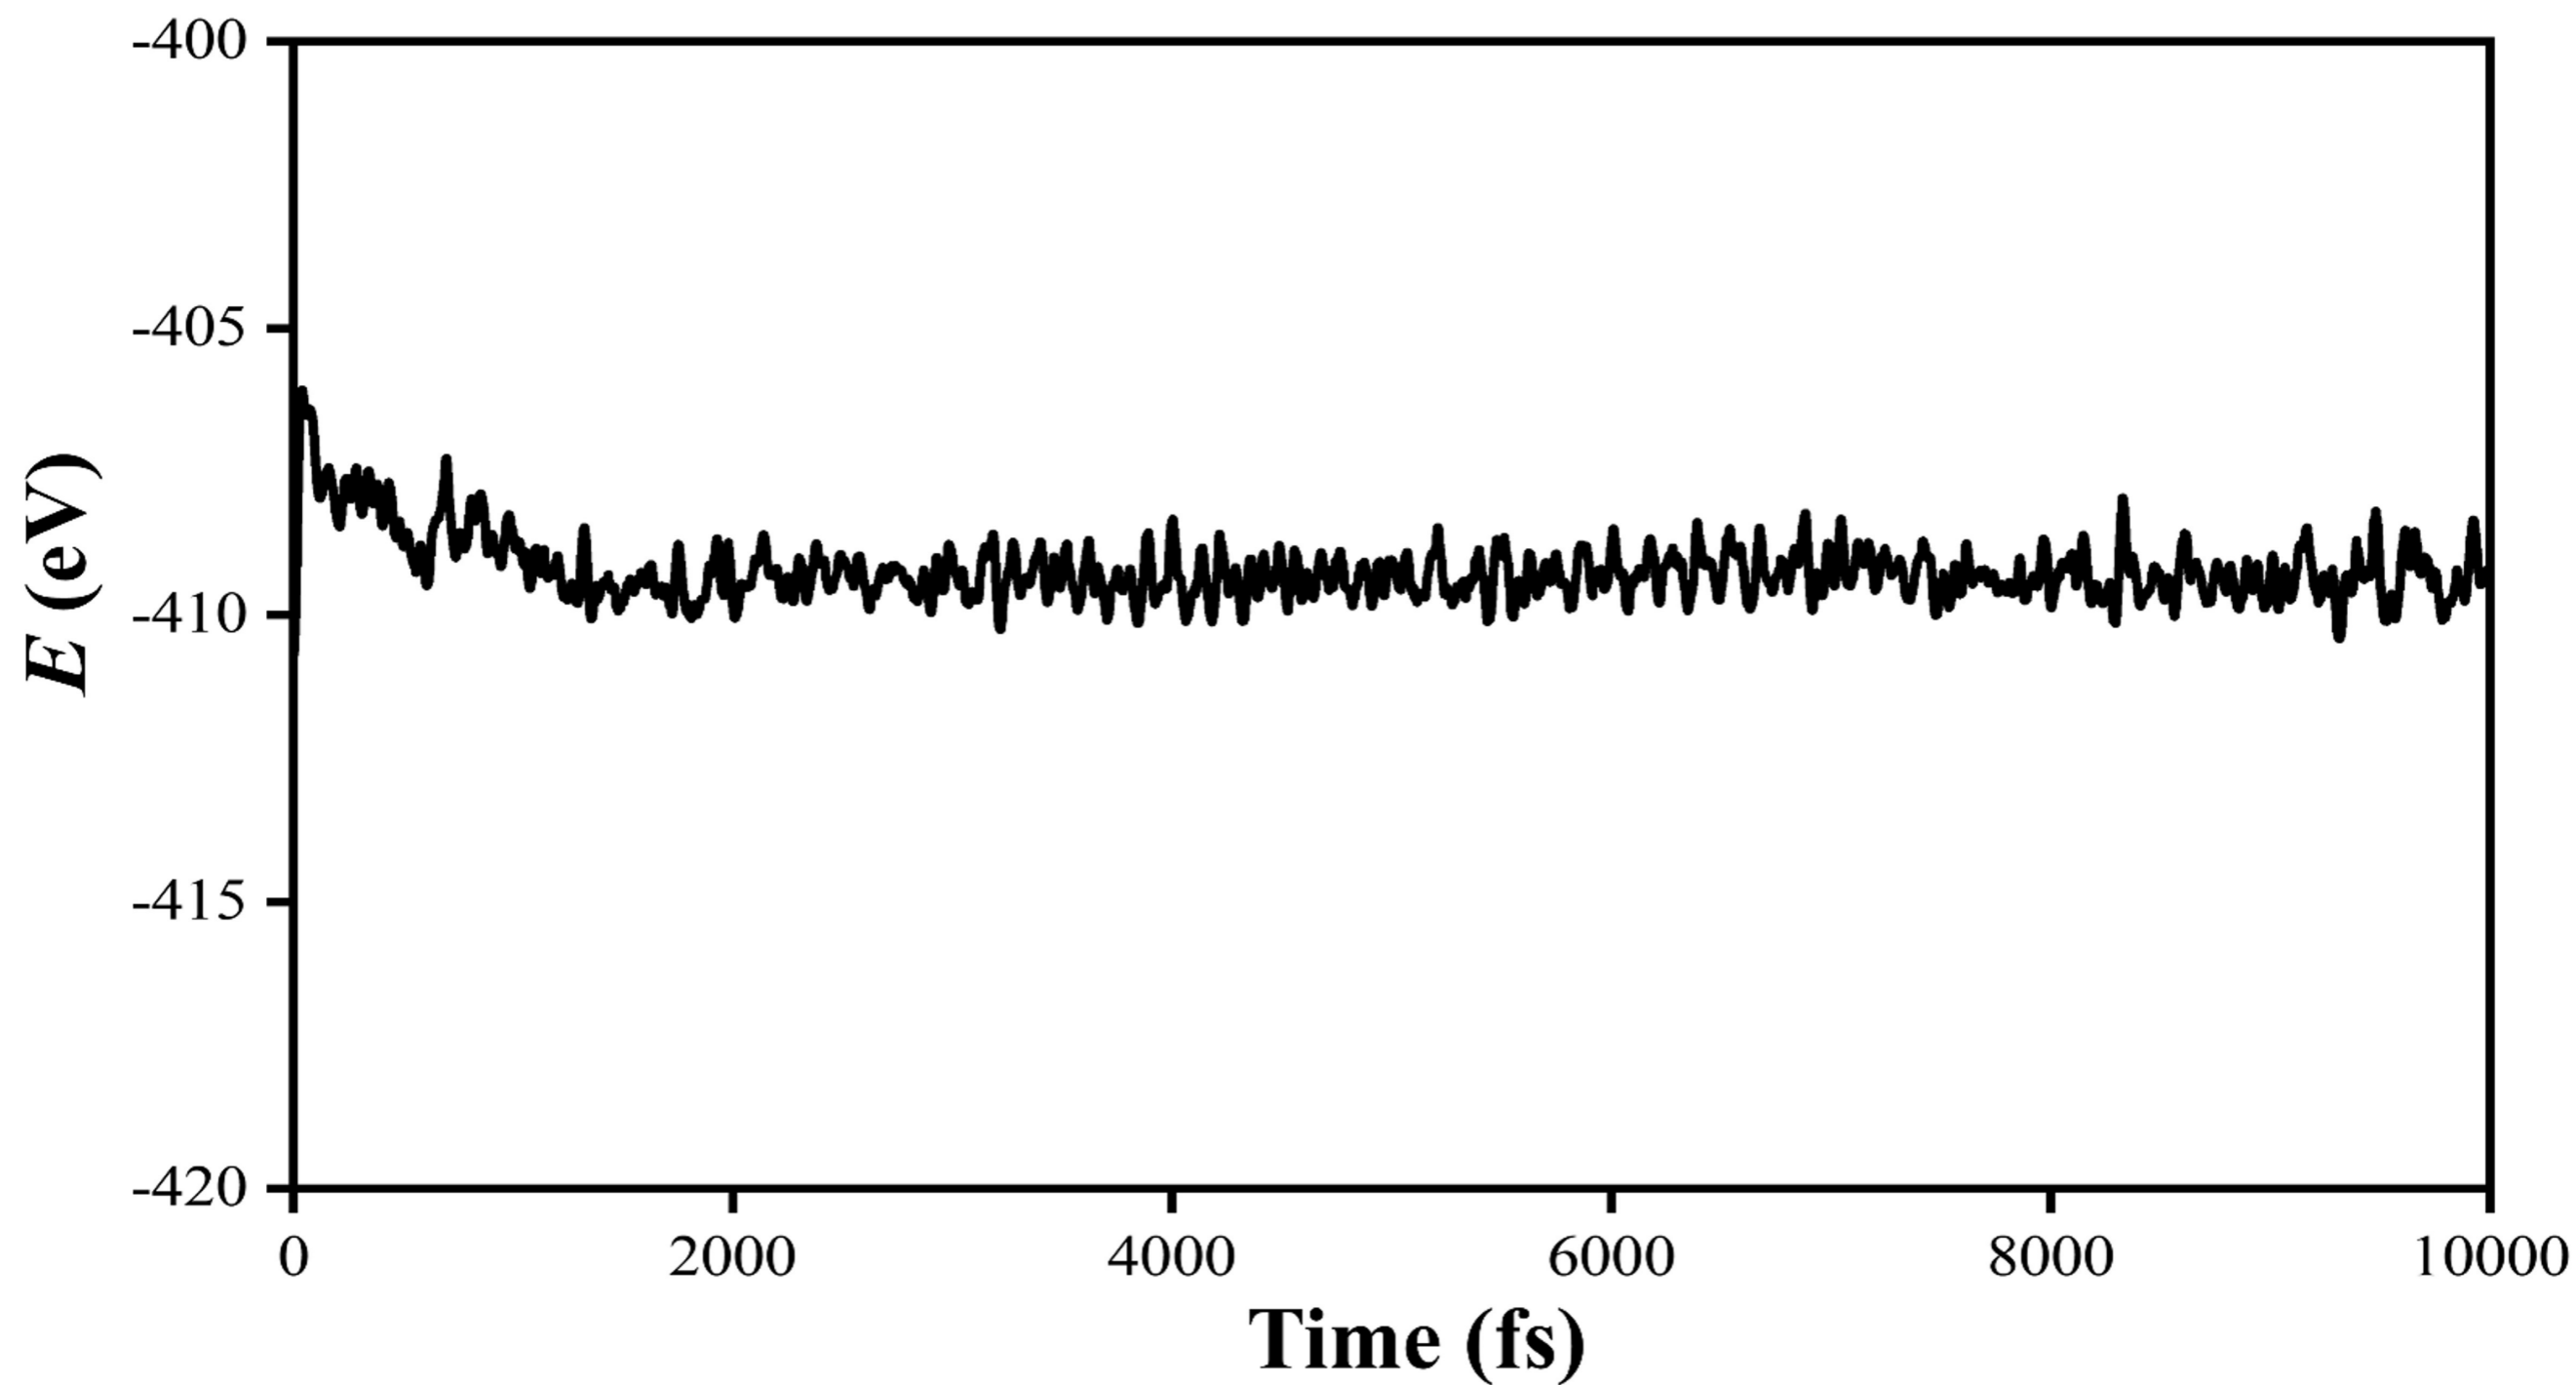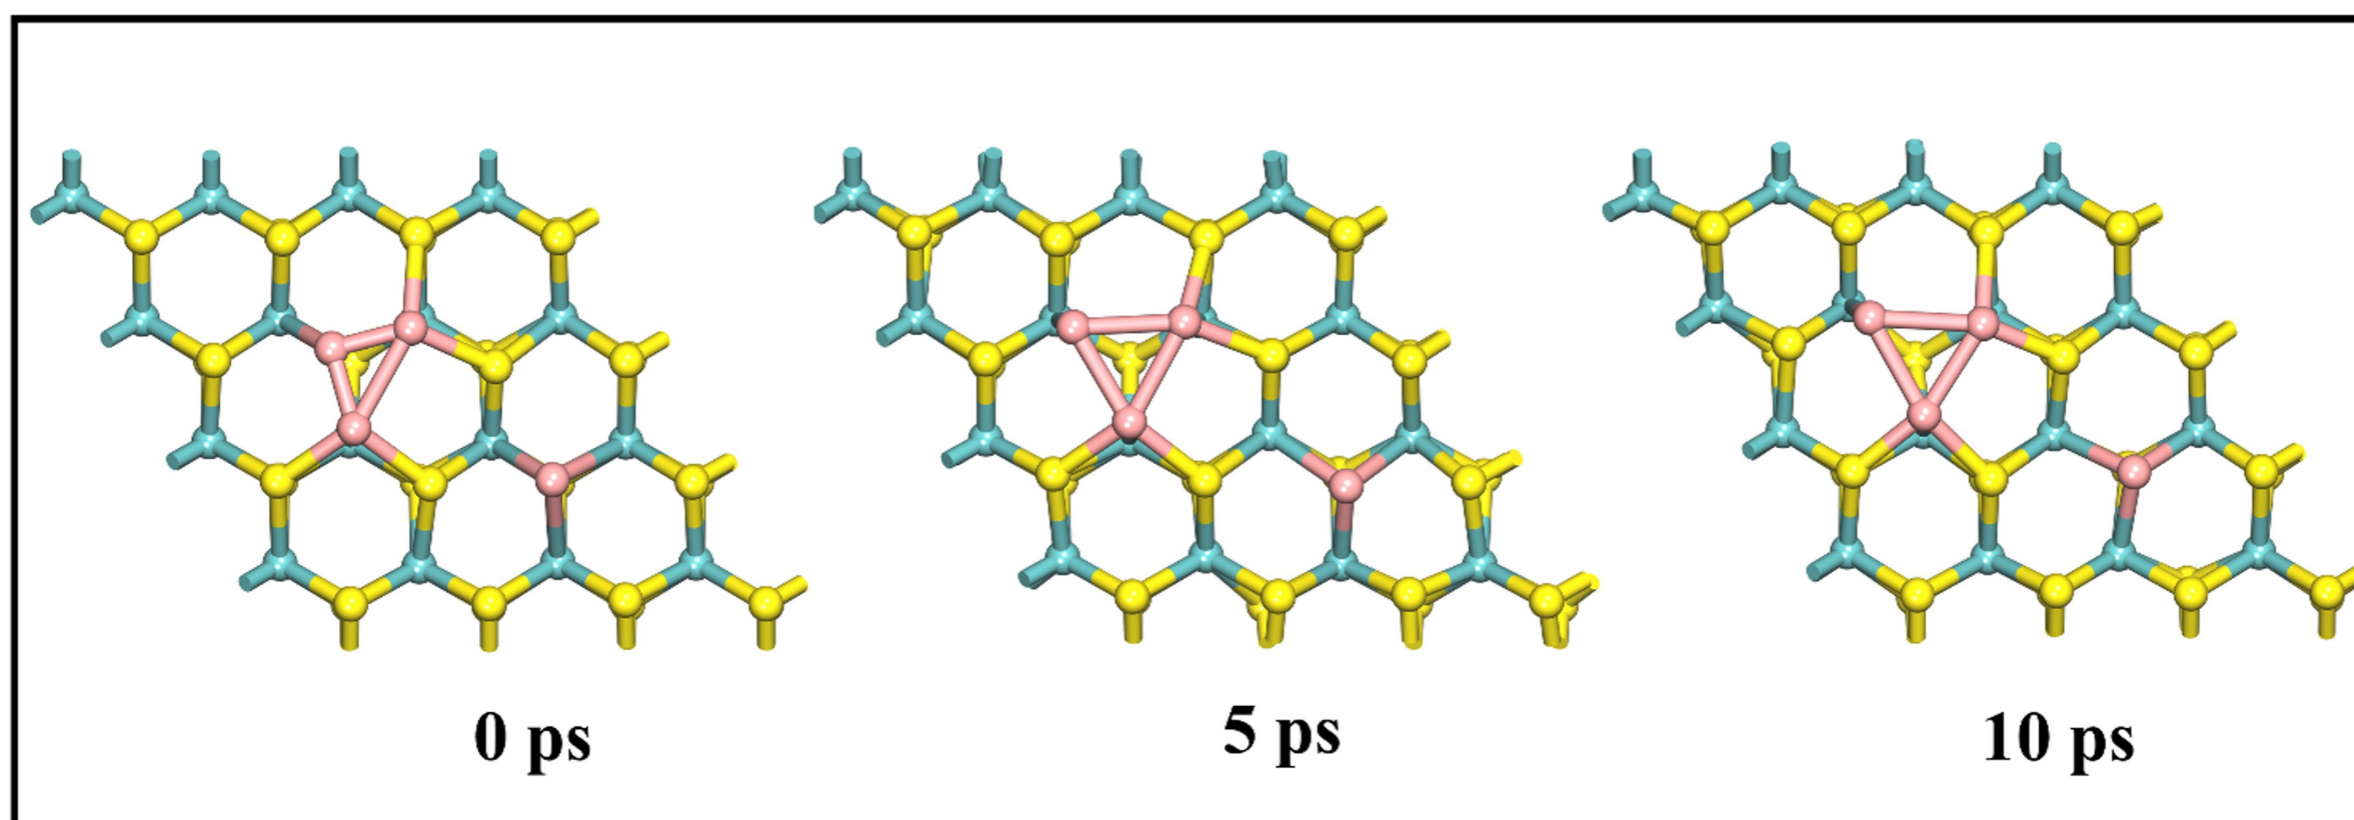

Supplement: d6cp01226d7.pdf [file d6cp01226d7.pdf]

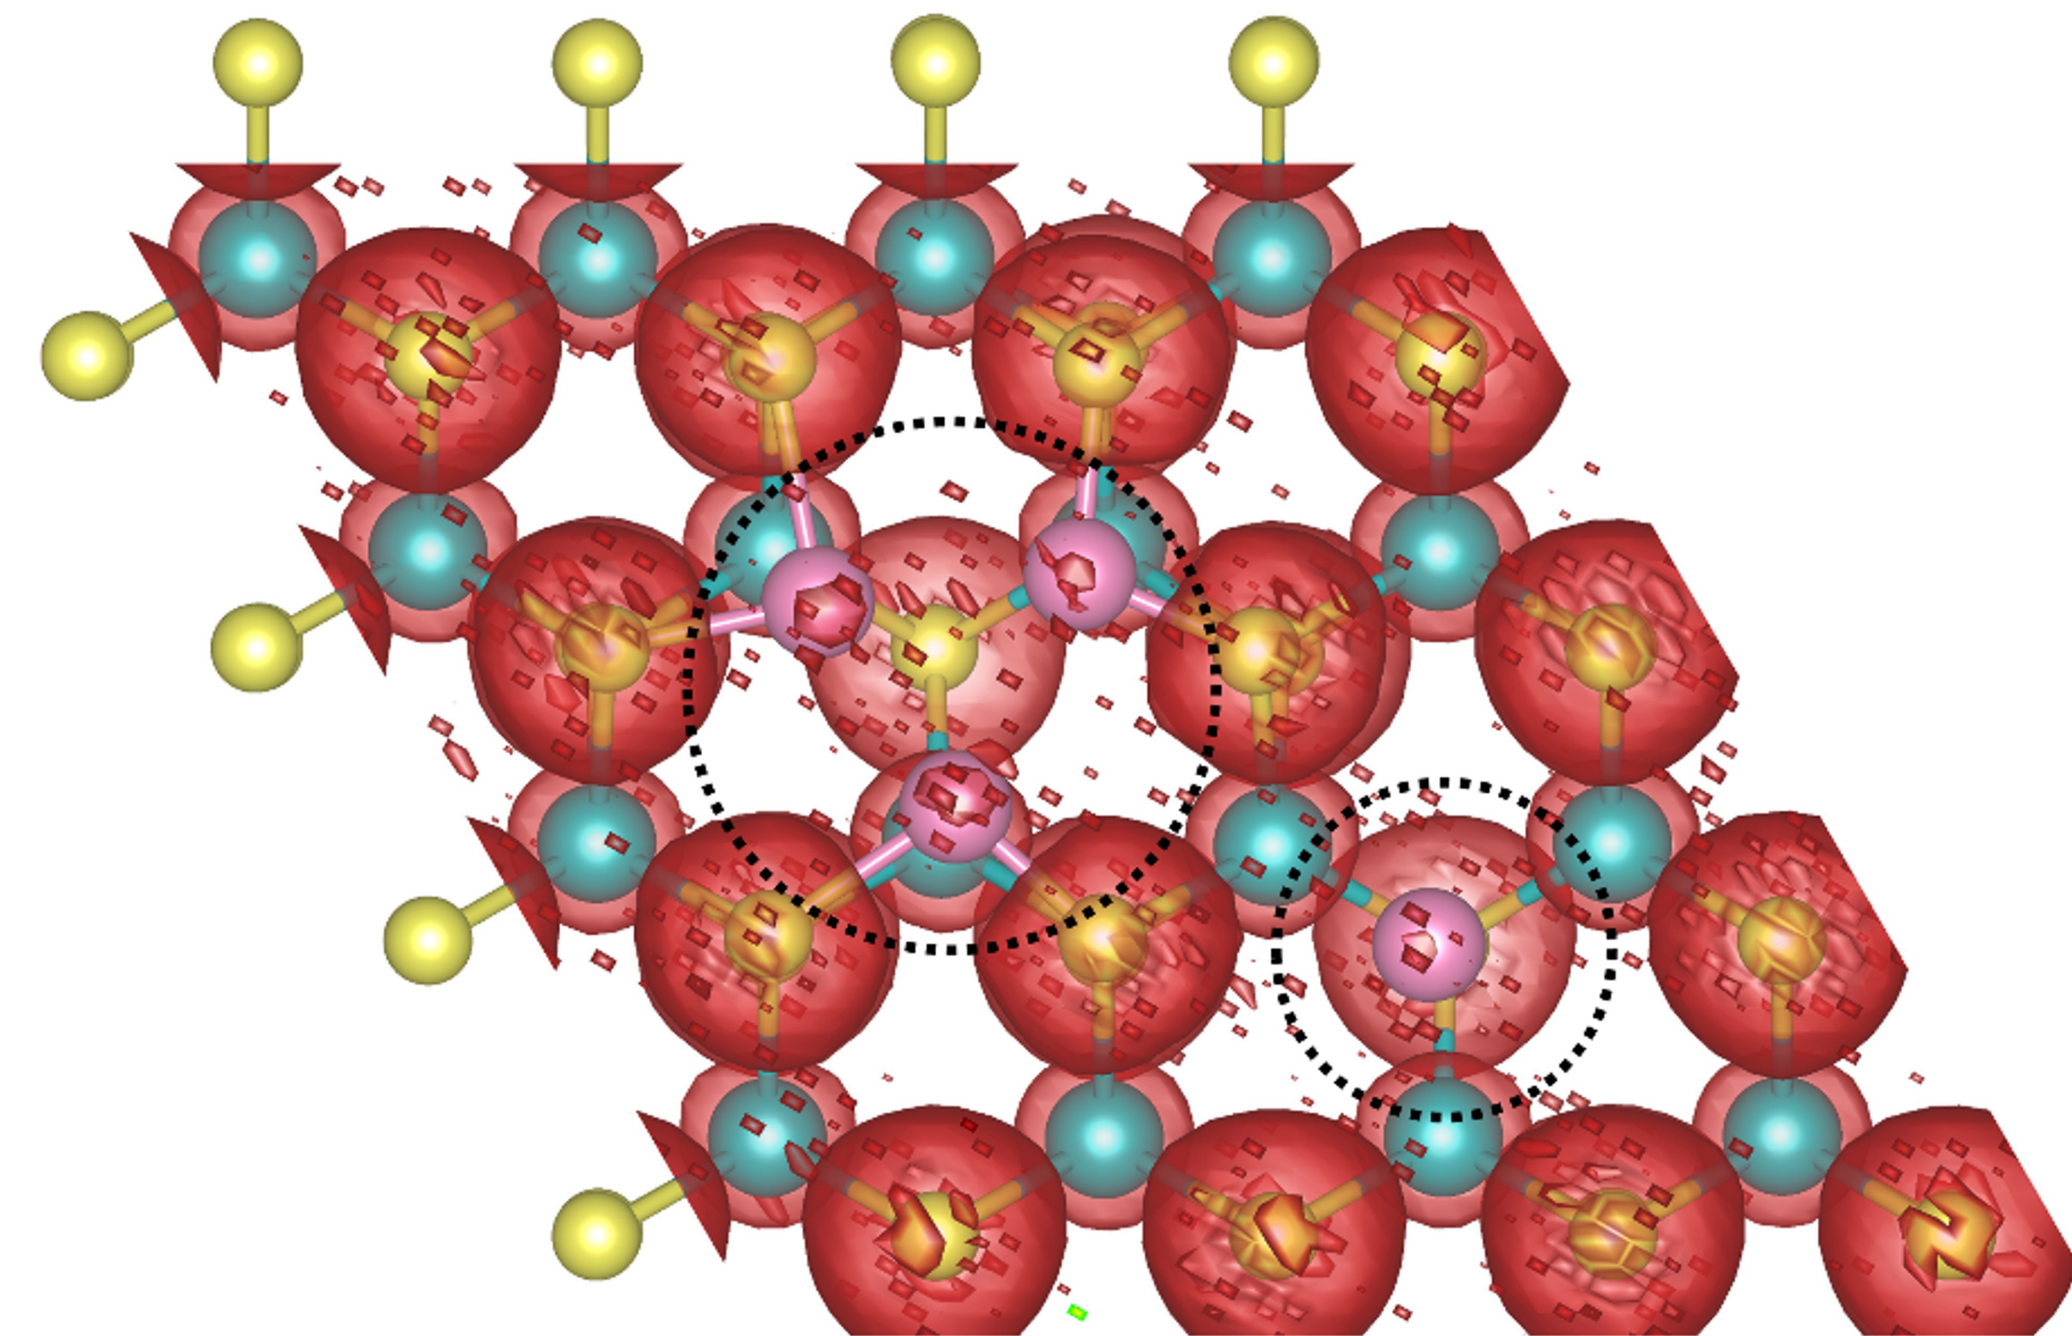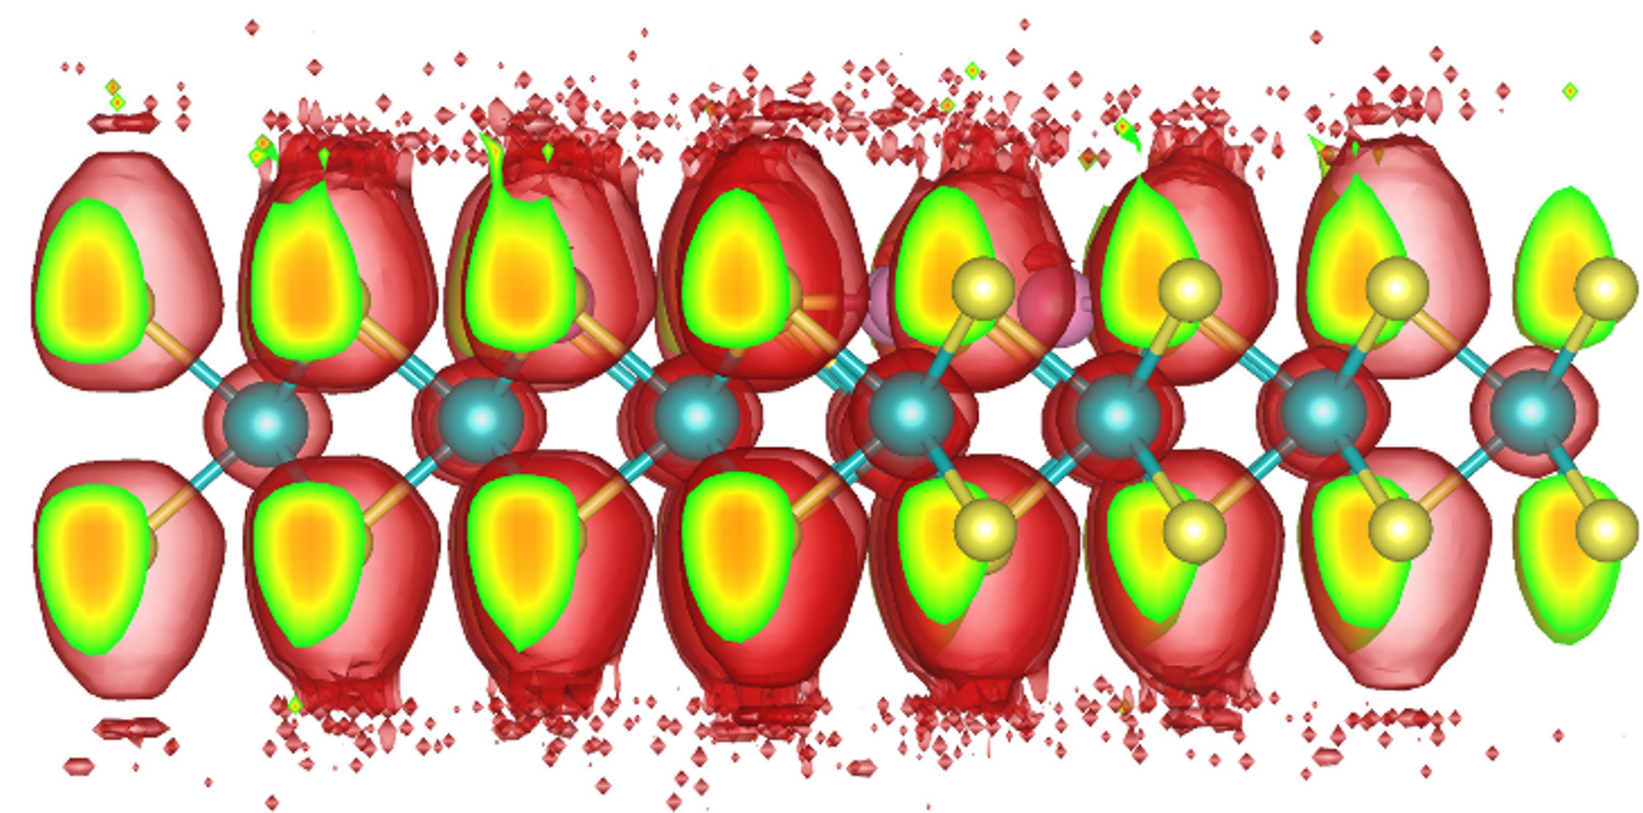

Supplement: d6cp01226d8.pdf [file d6cp01226d8.pdf]

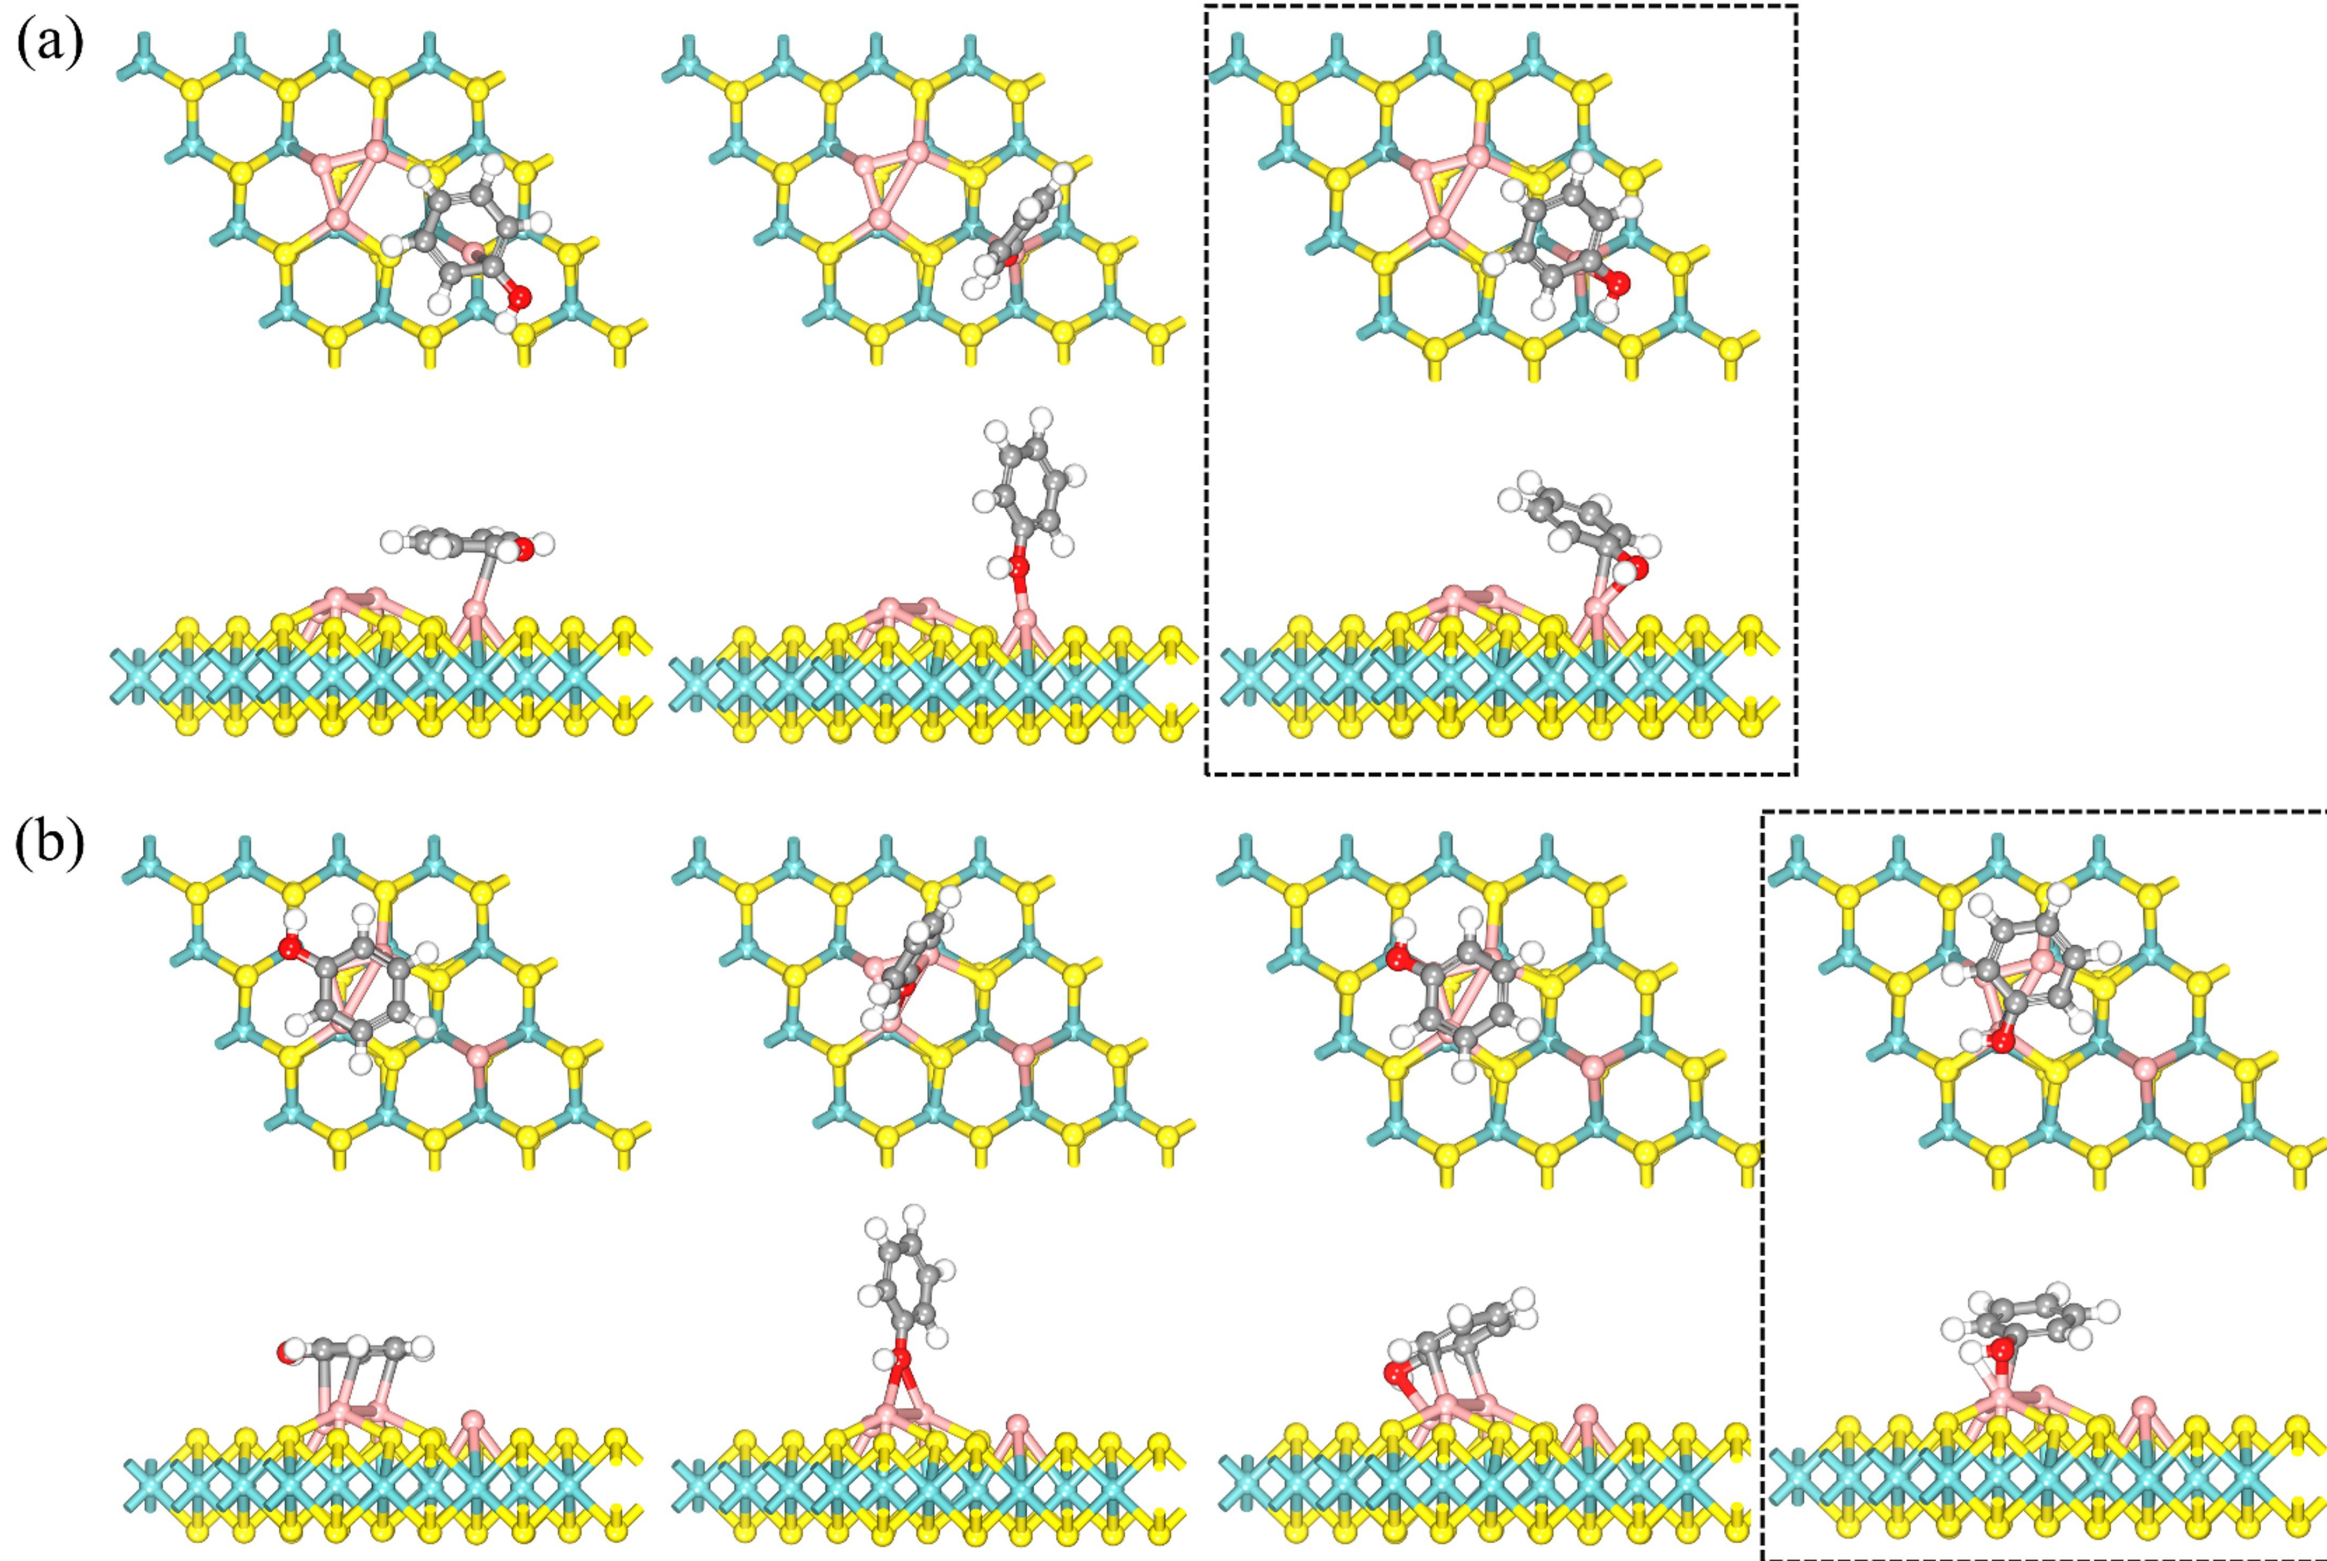

Supplement: d6cp01226d9.pdf [file d6cp01226d9.pdf]
